# Enzyme engineering and *in vivo* testing of a formate-reduction pathway

Jue Wang<sup>1</sup>, Karl Anderson<sup>1</sup>, Ellen Yang<sup>1</sup>, Lian He<sup>1</sup>, Mary E. Lidstrom<sup>1,2,\*</sup>

<sup>1</sup>Department of Chemical Engineering, University of Washington, USA

<sup>2</sup>Department of Microbiology, University of Washington, USA

\* Address correspondence to Jue Wang: [jue@uw.edu](mailto:jue@uw.edu)

## 1 Abstract

2 Formate is an attractive feedstock for sustainable microbial production of fuels and chemicals,  
3 but its potential is limited by the lack of efficient assimilation pathways. The reduction of formate  
4 to formaldehyde would allow efficient downstream assimilation, but no efficient enzymes are  
5 known for this transformation. To develop a 2-step formate-reduction pathway, we screened  
6 natural variants of acyl-CoA synthetase (ACS) and acylating aldehyde dehydrogenase (ACDH)  
7 for activity on one-carbon substrates and identified active and highly expressed homologs of  
8 both enzymes. We then performed directed evolution, increasing ACDH specific activity by 2.5-  
9 fold and ACS lysate activity by 5-fold. To test for *in vivo* activity of our pathway, we expressed it  
10 in a methylotroph which can natively assimilate formaldehyde. Although the enzymes were  
11 active in cell extracts, we could not detect formate assimilation into biomass, indicating that  
12 further improvement will be required for formatotrophy. Our work provides a foundation for  
13 further development of a versatile pathway for formate assimilation.

14 **Keywords:** formate assimilation; one-carbon; directed evolution; metabolic engineering;  
15 methylotrophy

## 16 Introduction

17 Population growth and climate change have created an urgent need for processes to produce  
18 more food, fuel, and chemicals while reducing CO<sub>2</sub> emissions. Engineered microbes have the  
19 potential to renewably produce many useful chemicals (1). However, most commercial  
20 bioproduction uses expensive sugar feedstocks that compete with the food supply. Carbon  
21 dioxide, as a ubiquitous industrial waste and greenhouse gas, is an attractive feedstock, but  
22 CO<sub>2</sub>-fixing organisms are technically challenging to adapt to industrial scale. These problems  
23 can potentially be solved by bio-inorganic hybrid systems, where electricity drives catalytic  
24 production of an energy-carrying molecule used by microbes to produce value-added  
25 compounds (2,3). Coupled to advanced photovoltaics, these systems can achieve solar-to-  
26 biomass conversion efficiencies approaching 10%, well beyond values of 3% for microalgae and  
27 1% for plants (4).

28 Formate is an attractive energy carrier for a bio-inorganic system because it can be produced  
29 efficiently by electrocatalysis (5), is highly soluble in water, and provides both carbon and  
30 reducing power to microbes (2,6). Formate can also be derived from waste biomass and fossil  
31 carbon, making it a flexible feedstock for bridging existing and future carbon economies (2).  
32 Unfortunately, organisms that naturally consume formate are poorly suited to industrial use, and  
33 moreover, natural formate-assimilation pathways are theoretically less efficient in their  
34 consumption of ATP and reducing equivalents than rationally designed alternatives (6–8).  
35 Recently, the first synthetic formate-assimilation pathway, the reductive glycine pathway  
36 (rGlyP), was successfully introduced into *E. coli* to support growth on formate and CO<sub>2</sub> as sole  
37 carbon sources (9,10). Although the rGlyP is energy-efficient and has great biotechnological

38 potential, it involves a CO<sub>2</sub>-fixation step that requires a high ambient CO<sub>2</sub> concentration in order  
39 to operate, potentially limiting its range of applications.

40 Several alternative formate-assimilation pathways have been proposed that could rival the  
41 efficiency of the rGlyP while not requiring CO<sub>2</sub> fixation (7). These pathways all have an initial  
42 step where formate is reduced to formaldehyde, which could potentially be achieved in two  
43 enzymatic reactions via a formyl-CoA intermediate (8). For example, the ribulose  
44 monophosphate (RuMP) pathway naturally occurs in methylotrophic bacteria and assimilates  
45 formaldehyde derived from methanol oxidation (11). Assuming formate could be reduced to  
46 formaldehyde, a bacterium utilizing the RuMP pathway could easily assimilate formate as well.  
47 A second option is the rationally designed homoserine cycle, in which formaldehyde is  
48 assimilated by aldolases to generate serine or threonine, which are then assimilated by native  
49 enzymes (12). Although this pathway is not naturally occurring, its reactions can be catalyzed  
50 relatively efficiently by pre-existing *E. coli* enzymes. A few other pathways could assimilate  
51 formate in theory but will require substantial enzyme engineering to support biomass production  
52 in practice. For example, the formolase enzyme can convert formaldehyde into  
53 dihydroxyacetone (8) or glycolaldehyde (13), which can be assimilated by either natural or  
54 engineered enzymes (14). An engineered enzyme can convert formyl-CoA and formaldehyde  
55 into glycolyl-CoA and then glycolate, which can be assimilated naturally (15,16). The common  
56 advance needed to enable all of these pathways is the reduction of formate to formaldehyde.  
57 Therefore, we sought to improve the two enzymes known to catalyze formate reduction.

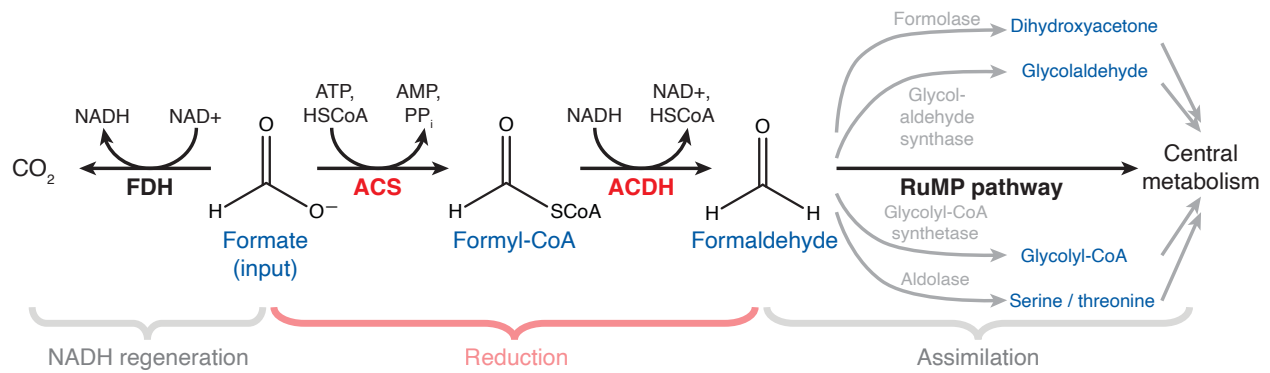

59 **Figure 1. Schematic of formate reduction pathway and associated reactions.**

60 The proposed pathway reduces formate to formaldehyde via the enzymes ACS and ACDH, highlighted in  
61 red. A portion of the formate is oxidized by formate dehydrogenase (FDH) to generate the NADH needed  
62 for formyl-CoA reduction. To assimilate the formaldehyde into central metabolism and thereby support  
63 growth, the pathway is integrated into an organism which natively contains the RuMP pathway (as well as  
64 FDH). Formaldehyde could also in principle be assimilated via other pathways, such as those starting with  
65 formolase, glycolaldehyde synthase, glycolyl-CoA synthetase, or a serine/threonine aldolase.

66 **Results**

67 **Discovery of active natural ACS variants**

68 Previous work showed that *E. coli* acetyl-CoA synthetase (EcACS) and *L. monocytogenes*  
69 acylating acetaldehyde dehydrogenase (LmACDH) can reduce formate to formaldehyde (8).  
70 However, the wildtype enzymes tested had poor activity on the one-carbon substrates and failed  
71 to support formate reduction *in vivo* as part of the formolase pathway. To identify potential  
72 homologs of ACS with increased formyl-CoA synthetase activity, we collected 8,911 ACS  
73 sequences from UniProt and chose 41 phylogenetically diverse homologs to test experimentally  
74 (Figure S1; Materials and Methods). The chosen sequences include EcACS as well as  
75 StACSstab, a computationally stabilized variant of the *S. typhimurium* ACS well-suited to  
76 directed evolution (17). We also included ACSs from *P. aerophilum* and *K. stuttgartensis*, which

77 are reported to have relatively high formate activities of 27% to 65% of their acetate activities,  
 78 respectively (18,19).

79 We obtained the set of ACS homologs via DNA synthesis, expressed them in *E. coli*, and  
 80 screened their activity in clarified *E. coli* lysates using a plate-based endpoint assay with the  
 81 DTNB reagent (Materials and Methods). We performed the screens in 50mM formate, close to  
 82 the  $K_m$  of EcACS from pilot experiments, to reveal variation in  $k_{cat}/K_m$  across homologs. Initially  
 83 we tested 11 homologs (Figure S1); using these results to highlight clades containing active  
 84 variants, we then chose 30 more homologs to test. From the full set of 41 homologs, 30 had  
 85 significantly higher activity than the empty vector control at a 5% false discovery rate (Figure 2A;  
 86 Table S1; t-test with Benjamini-Hochberg correction), and two had higher activity than EcACS.  
 87 StACSstab had lower activity than EcACS in this lysate assay, but since StACSstab is well-  
 88 characterized (20), we chose to include it along with the top five ACS homologs for further  
 89 analysis.

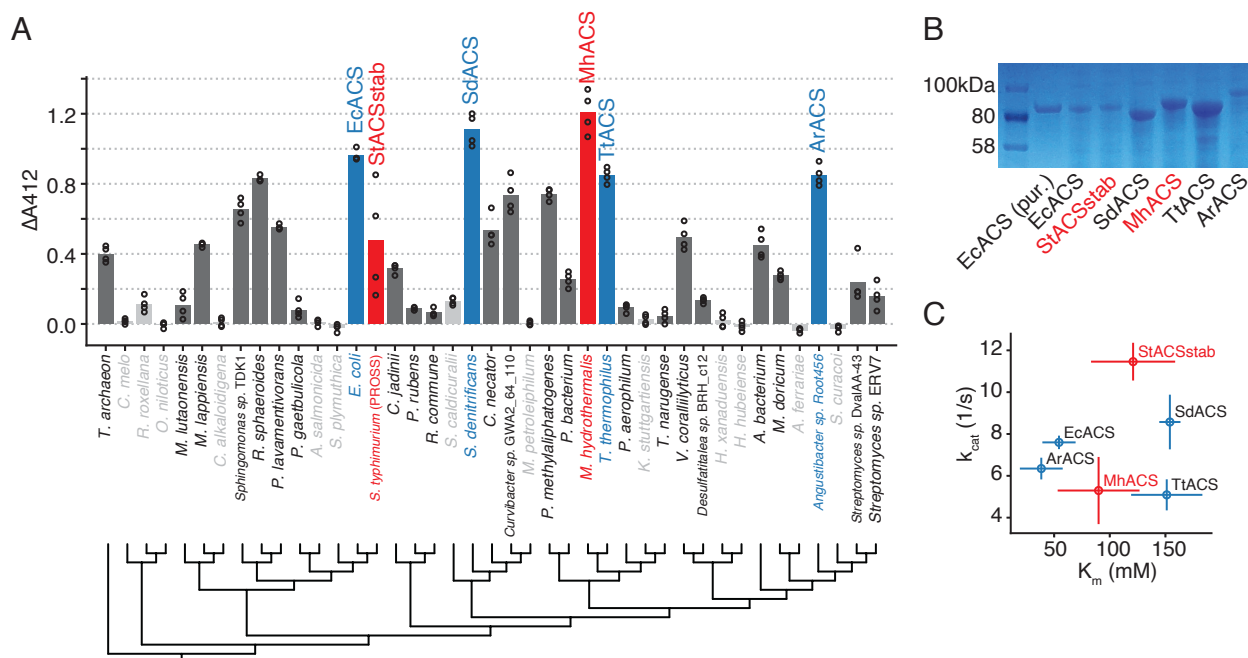

90

91 **Figure 2. Screening natural ACS homologs identifies enzymes with formate activity.**

92 A) Lysate activity in *E. coli* for 41 ACS homologs versus their phylogeny. Activity is shown as absorbance  
93 at 412nm from the DTNB-based discontinuous assay after subtracting background (See also Figure S1;  
94 raw data in Table S1A). Circles show replicates and bars show the mean. Highlighted in color are 6  
95 homologs chosen for purification and kinetic characterization; in red are 2 homologs chosen for directed  
96 evolution. Enzymes with statistically significant activity compared to empty vector (FDR=0.05, 2-sample t-  
97 test with Benjamini-Hochberg correction) are shown in dark gray or colored bars and black font; non-  
98 significant activity is indicated by light gray bars and font. Phylogenetic tree is a maximum-likelihood tree  
99 calculated via FastTree2 (Materials and Methods). B) SDS-PAGE on clarified lysates from 6 chosen ACS  
100 homologs. Each lane contains lysate from equal biomass. Lane 2 contains purified EcACS. C) Scatterplot  
101 of kinetic parameters  $k_{cat}$  versus  $K_m$  on formate of 6 chosen ACS homologs (see Figure S2 for raw  
102 kinetics data).

103 To determine whether high lysate activity of top homologs was due to increased soluble  
104 expression, we analyzed clarified lysates by SDS-PAGE. This showed that 3 of the enzymes  
105 had much higher soluble expression than the others (SdACS, MhACS, and TtACS in Figure  
106 2B). We then used a myokinase-coupled continuous assay to determine the kinetic parameters  
107 of purified enzymes (Figure 2C, S2; Materials and Methods). We assayed these homologs using  
108 formate as well as acetate, the likely native substrate, to determine whether any of these ACSs  
109 are already naturally biased toward one-carbon substrates. Despite its relatively low lysate  
110 activity, StACSstab had the highest  $k_{cat}$  of the 6 enzymes, on both formate and acetate ( $11.4 \pm$   
111  $0.9 \text{ s}^{-1}$  and  $50.9 \pm 3.1 \text{ s}^{-1}$ , respectively; Figure S4A). On the other hand, EcACS and ArACS had  
112 the lowest  $K_m$ s ( $54.4 \pm 14.9 \text{ mM}$  and  $38.5 \pm 19.3 \text{ mM}$ ; Figure 2C) and highest catalytic  
113 efficiencies ( $k_{cat}/K_m$ ) on formate ( $148 \pm 48 \text{ M}^{-1}\text{s}^{-1}$  and  $204 \pm 119 \text{ M}^{-1}\text{s}^{-1}$ ; Figure S4A). In general,  
114  $K_m$ s on formate were about 3 orders of magnitude higher than on acetate. As a result, all  
115 enzymes had much lower catalytic efficiencies on formate ( $k_{cat}/K_m$  between  $50$  and  $200 \text{ M}^{-1}\text{s}^{-1}$ )  
116 than on acetate (between  $2 \times 10^5$  and  $5 \times 10^5 \text{ M}^{-1}\text{s}^{-1}$ ) (Figure 3A), although there is some variation  
117 in this specificity ratio (Figure S4B). The measured  $k_{cat}$  values were also generally lower for

118 formate than for acetate, although usually by less than one order of magnitude. In one case,  
119 SdACS actually has higher formate  $k_{\text{cat}}$  ( $8.6 \pm 1.3 \text{ s}^{-1}$ ) than acetate  $k_{\text{cat}}$  ( $7.0 \pm 0.4 \text{ s}^{-1}$ ).

## 120 **Directed evolution of ACS**

121 Given that even the most active of these ACS homologs is still 2-3 orders of magnitude less  
122 efficient on formate than on acetate, we performed directed evolution to increase the formate  
123 activity of ACS. No single homolog simultaneously had the highest activity, expression, and  
124 specificity, so we chose two parent enzymes: StACSstab because it had the highest  $k_{\text{cat}}$ , and  
125 MhACS (from *M. hydrothermalis*) because it had the highest lysate activity. Both are also likely  
126 tolerant to mutation, since StACSstab is computationally stabilized and MhACS comes from a  
127 thermophile (21).

128 We took a semi-rational approach to engineer StACSstab using a published crystal structure of  
129 the wildtype StACS (PDB: 2p2f). StACSstab has 46 mutations relative to StACS (93% amino-  
130 acid identity), but these mutations were designed to avoid perturbing the structure of the active  
131 site (17). Therefore, we used the StACS structure and previous mutagenesis studies to choose  
132 a set of 18 residues lining the active-site pocket near the acyl moiety for mutagenesis (Figure  
133 3A, Table 1) (Materials and Methods) (20,22,23). We screened lysates of single-site-saturating  
134 libraries of these 18 positions in StACS using a continuous assay in 50mM formate, followed by  
135 a secondary screen with plate-based purification (Figure S5; Materials and Methods). We  
136 identified 2 mutations, N521V (StACSstab1) and N521L (StACSstab2) that increased lysate  
137 activity by almost 3-fold (Figure 3B). Then, using StACSstab1 as a parent, we mutated positions  
138 that were beneficial in round 1 as well as new positions that were structurally proximal to N521,  
139 screening using the discontinuous assay. We isolated N521V W414F, N521V F260W, and  
140 N521V G524A (StACSstab3, StACSstab4, and StACSstab5, respectively) as variants with



141 further improved lysate activity (Figure 3B). Previous work found that V310 and V387, which line  
 142 the acyl-binding pocket in ACS, play a strong role in controlling substrate specificity (20,22).  
 143 Therefore, in a third round of evolution, we combinatorially mutated these 2 positions to each of  
 144 3 larger hydrophobic amino acids. However, this failed to generate any improved variants (Table  
 145 1). In a final round, we combined the mutations discovered in round 2 and identified N521V  
 146 W414F G524A (StACSstab6) as the most-improved candidates (Figure 3B). From StACSstab to  
 147 StACSstab6, lysate activity increased by 5.8-fold (ratio of median of 4 replicates in Figure 3B).

| Campaign parent | Round | Round parent(s)         | Mutations made                                                                                                               | Highest lysate activity                                                      |
|-----------------|-------|-------------------------|------------------------------------------------------------------------------------------------------------------------------|------------------------------------------------------------------------------|
| StACSstab       | 1     | StACSstab               | F260X, W309X, V310X, T311X, Y315X, Y355X, V386X, G387X, E388X, T412X, W414X, Q415X, T416X, G420X, F421X, Y496X, N521X, G524X | StACSstab1 (N521V), StACSstab2 (N521L)                                       |
|                 | 2     | StACSstab1              | F260X, L262X, V310X, V386X, W414X, F421X, R515X, L520X, V522X, S523X, G524X, G556X, Q557X                                    | StACSstab3 (N521V W414F), StACSstab4 (N521V F260W), StACSstab5 (N521V G524A) |
|                 | 3     | StACSstab, StACSstab1-5 | V310VILM+V386VILM                                                                                                            | None                                                                         |
|                 | 4     | StACSstab2-5            | F260X, L262X, W414X, G524X                                                                                                   | StACSstab6 (N521V W414F G524A)                                               |
| MhACS           | 1     | MhACS                   | F262X+W414X+N521NKIVLSDQ                                                                                                     | MhACS1 (F262W W416F N524S)                                                   |
|                 | 2     | MhACS1                  | W414X, F423X, Y499X                                                                                                          | MhACS2 (F262W W416F Y499V N524S)                                             |
|                 | 3     | MhACS2                  | L523X, N524X, G527X, E560X                                                                                                   | MhACS3 (F262W W416F Y499V N524R)                                             |
| LmACDH          | 1     | LmACDH                  | I250X, C251X, A252X, L418X, L420X                                                                                            | LmACDH1 (A252S)                                                              |
|                 | 2     | LmACDH1                 | I250X, C251X, S253X, T374, A404X, G407X                                                                                      | LmACDH2 (A252S S253C)                                                        |

148

149 **Table 1. Directed evolution campaigns on StACSstab, MhACS, and LmACDH**

150 All mutant libraries were from single-site-saturating mutagenesis (e.g. “F260X, W309X” denotes 2  
 151 libraries, of which one contains F260 mutated to all 20 substitutions, the other W309 mutated to all 20  
 152 substitutions), unless specific subsets of substitutions are indicated. Plus sign “+” indicates a  
 153 combinatorial library at multiple positions. Screening data for a subset of evolution rounds is shown in the  
 154 supplemental figures.

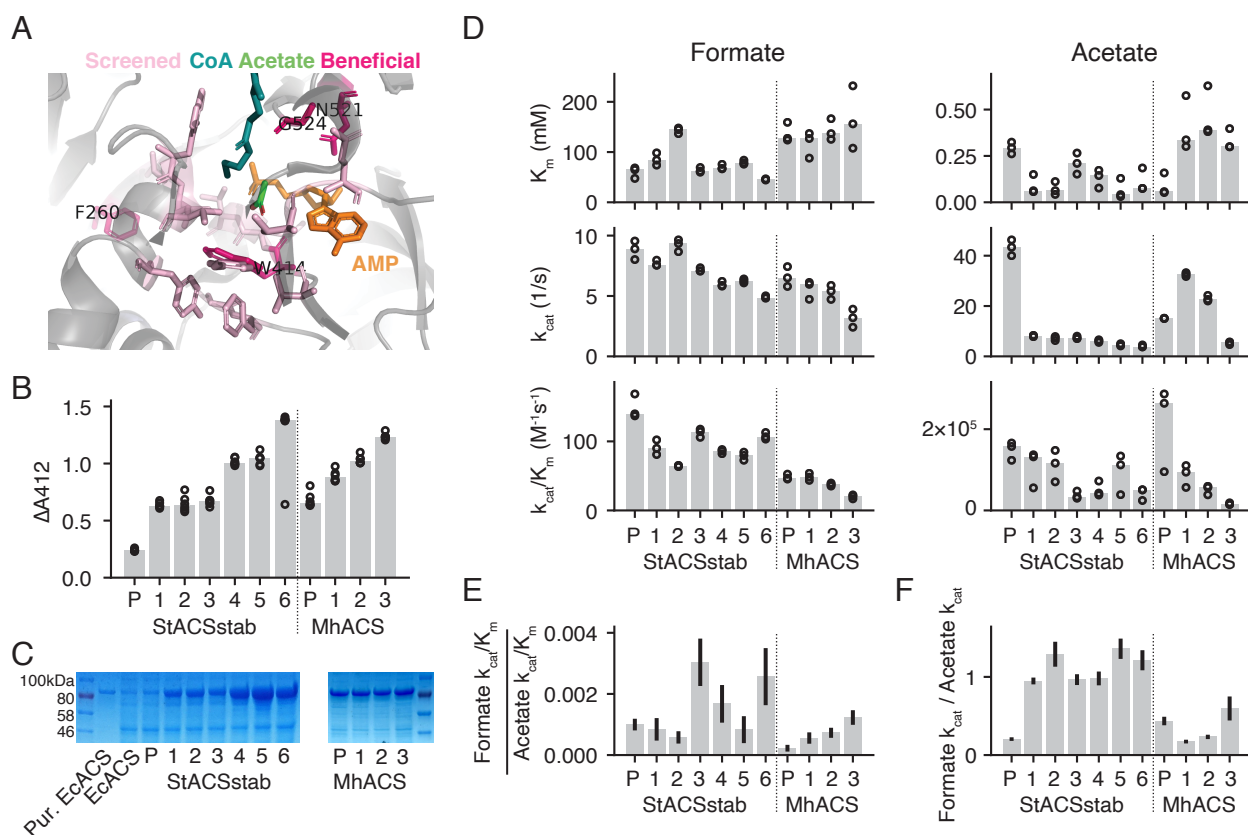

155 **Figure 3. Directed evolution of ACS improves expression and specificity, but not specific activity.**  
 156 A) Structure of *S. typhimurium* ACS (PDB: 2p2f) with residues chosen for site-saturating mutagenesis  
 157 highlighted in light pink. Residues that yielded beneficial mutations that were kept in the evolved variants  
 158 highlighted in dark pink. B) Background-subtracted lysate activity in *E. coli* using the discontinuous  
 159 assay (Materials and Methods) on evolved variants of StACSstab and MhACS. All enzyme variants  
 160 shown were isolated in host strain BL21\*(DE3), except MhACS3, which was isolated in NovaBlue(DE3)  
 161 (Figure S6). Circles show 3 replicates and bars show the median. “P” indicates parental or wildtype  
 162 enzyme, and numbered variants correspond to mutants listed in Table 1. C) SDS-PAGE of clarified  
 163 lysates of expression cultures of each evolved variant. Each lane contains lysates from equal biomass. D)  
 164  $K_m$ ,  $k_{cat}$ , and  $k_{cat}/K_m$  for formate and acetate of evolved variants. Circles show 3 replicates and bars show  
 165

166 the median. These parameters are also listed in Table S2. E) Ratios of formate  $k_{\text{cat}}/K_m$  to acetate  $k_{\text{cat}}/K_m$ .  
167 F) Ratios of formate  $k_{\text{cat}}$  to acetate  $k_{\text{cat}}$ . Error bars represent s.d. of the ratios estimated using the replicate  
168 data.

169 To determine whether increases in lysate activity translated to increases in specific activity, we  
170 purified the ACS variants and measured their kinetic parameters. The initial variants  
171 StACSstab1 and StACSstab2 have similar  $k_{\text{cat}}$  on formate to the parent enzyme (7-10  $\text{s}^{-1}$ ), but  
172 have 5.3-fold and 6.0-fold lower  $k_{\text{cat}}$  on acetate (Figure 3D), respectively. This is accompanied  
173 by higher soluble expression (Figure 3C), suggesting that high levels of native (acetate) activity  
174 may be toxic and prevents high expression of parental StACSstab. Subsequent variants  
175 StACSstab2 through StACSstab6 continued to increase in soluble expression as well as  
176 formate specificity. The final variant StACSstab6 had a ratio of formate to acetate  $k_{\text{cat}}/K_m$  2.6-  
177 fold higher than that of StACSstab. The formate to acetate  $k_{\text{cat}}$  ratio increased even more, by  
178 5.9-fold, between these enzymes.

179 Although directed evolution increased expression and formate specificity, it did not increase  
180 formate activity. In fact, catalytic activity decreased modestly over the course of evolution. The  
181 final mutant, StACSstab6, has a formate  $k_{\text{cat}}$  of  $4.9 \pm 0.1 \text{ s}^{-1}$  and  $k_{\text{cat}}/K_m$  of  $108 \pm 5 \text{ M}^{-1}\text{s}^{-1}$ , 45%  
182 and 28% lower, respectively, than StACSstab's  $k_{\text{cat}}$  of  $8.8 \pm 0.8 \text{ s}^{-1}$  and  $k_{\text{cat}}/K_m$  of  $149 \pm 18 \text{ M}^{-1}\text{s}^{-1}$   
183 (Figure 3D, Table S2). Normalizing the relative change in lysate activity to that of  $k_{\text{cat}}/K_m$ , we  
184 estimate the change in functional expression to be 8-fold, consistent with the qualitative  
185 increase in band intensity on the SDS-PAGE gel.

186 To engineer MhACS, we mutated a small set of positions corresponding to those in StACSstab  
187 that yielded beneficial mutations (Table 1). We first screened a combinatorial library with  
188 mutations at positions F262, W416, N524, and G527 (corresponding to StACSstab F260, W414,  
189 N521, and G524), which yielded a mutant F262Y W416F N524S (MhACS1) with improved

190 lysate activity. Using MhACS1 as a parent, we then screened single-site-saturating libraries and  
191 discovered an improved variant with additional mutation Y499V (MhACS2). At this point,  
192 screening additional site-saturating libraries MhACS2 failed to yield improved mutants. Given  
193 the correlation between higher StACSstab expression and lower ACS activity, we hypothesized  
194 that an *E. coli* host strain with lower basal expression may increase our chances of isolating  
195 more improved mutants. Therefore, we switched from the BL21\*(DE3) host strain to  
196 NovaBlue(DE3), which has the stronger LacI<sup>q</sup> repressor (Figure S6). Starting with MhACS2 and  
197 screening site-saturating libraries, we obtained a mutant with S524R (MhACS3; N524R relative  
198 to MhACS) with 1.9-fold higher lysate activity than the MhACS parent (Figure 3B).

199 As with StACSstab, increased lysate activity of MhACS mutants did not translate to increased  
200 specific activity, but rather a decrease in formate  $k_{\text{cat}}$  and  $k_{\text{cat}}/K_m$  over the course of evolution  
201 (Figure 3D). Formate  $K_m$  also did not change appreciably, staying around 150 mM in all variants  
202 (Figure 3D, Table S2). Like StACSstab, the  $k_{\text{cat}}/K_m$  for acetate decreased in successive rounds  
203 of mutation. Thus, the ratio of formate to acetate  $k_{\text{cat}}/K_m$  increased by 5.5-fold from MhACS to  
204 MhACS3, although its absolute value is lower for MhACS3 than for StACSstab6. Interestingly,  
205 the decrease in acetate  $k_{\text{cat}}/K_m$  in MhACS3 was due to a combination of increased  $K_m$  and  
206 decreased  $k_{\text{cat}}$  contributed by different mutations. By contrast, in the StACSstab evolutionary  
207 trajectory, the major change was a drastic decrease in  $k_{\text{cat}}$  caused by the initial N521V mutation,  
208 which was actually negated somewhat by a decrease in  $K_m$ . Normalizing the increase in lysate  
209 activity from MhACS to MhACS3 by the 59% decrease in formate  $k_{\text{cat}}/K_m$ , we find that functional  
210 expression of MhACS3 is 4.6-fold higher than that of MhACS. This is surprising given the  
211 roughly similar apparent expression of all MhACS variants, perhaps suggesting a change in the  
212 active fraction of expressed protein.

## 213 **Discovery and improvement of ACDH**

214 Previous work used *Listeria monocytogenes* (LmACDH) for formate reduction because it was  
215 the most active of 5 homologs tested (8). We sought to identify additional active variants by a  
216 two-pronged strategy of homolog screening and directed evolution. Although formyl-CoA is the  
217 desired substrate of ACDH, it is not commercially available and has a very short half-life(15).  
218 Therefore, we screened ACDHs using formate as a substrate instead, including ACS as a  
219 coupling enzyme to generate formyl-CoA in the reaction (Figure S7A). This does not allow  
220 quantitative estimation of the  $K_m$  of ACDH for formyl-CoA but is sufficient to determine the  
221 relative activities of ACDH variants.

222 We analyzed all available ACDH homologs in UniProt and BRENDA, and chose 46 for gene  
223 synthesis and testing. Alignment and clustering of ACDHs revealed two divergent clades with  
224 roughly equal numbers of sequences (Figure 4). One clade contained members such as *E. coli*  
225 MhpF, which natively operates as a complex with an aldolase (24). EcMhpF was previously  
226 shown to have low activity compared to LmACDH(8), suggesting difficulties in expressing the  
227 monomer form. Therefore, we avoided members of the MhpF-like clade and focused instead on  
228 the clade containing *E. coli* AdhE, LmACDH, and bacterial-microcompartment-associated  
229 enzymes such as EutE (25).

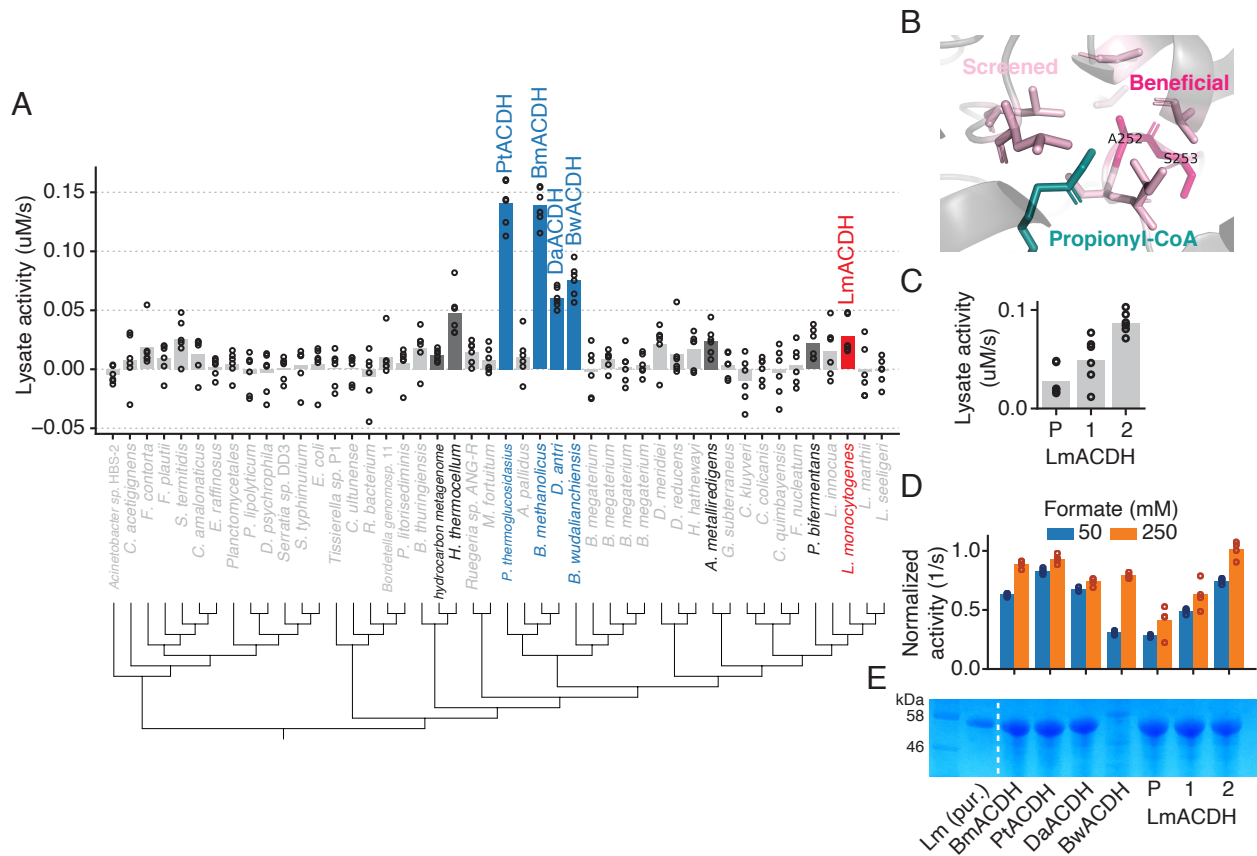

230

231 **Figure 4. Homolog screening and directed evolution of ACDH enzymes.**

232 A) Lysate activity of ACDH homologs. Dots show technical replicates from 2 independent expression  
 233 strain transformants; bars show mean of all replicates. Enzymes with statistically significant activity  
 234 compared to empty vector (FDR=0.05, 2-sample t-test with Benjamini-Hochberg correction) are shown in  
 235 dark gray or colored bars and black font; non-significant activity is indicated by light gray bars and font.  
 236 Blue indicates enzymes chosen for followup characterization and red indicates enzyme used for directed  
 237 evolution. Raw data in Table S1B. B) Structure of *L. monocytogenes* ACDH (3k9d, propionyl-CoA from  
 238 5jfn) with residues chosen for site-saturating mutagenesis shown in light pink. Residues that yielded  
 239 beneficial mutations that were kept in the evolved variants are highlighted in dark pink. C) Lysate activity  
 240 of evolved LmACDH variants. “P” indicates parental or wildtype enzyme, and numbered variants  
 241 correspond to mutants listed in Table 1. Circles represent 3 technical replicates and bars show the mean.  
 242 D) Activity of selected homologs and evolved LmACDH variants, normalized to enzyme concentration.  
 243 Shares x-axis labels with panel E. E) SDS-PAGE of clarified lysates of *E. coli* strains expressing ACDH  
 244 variants. Each lane contains lysate from equal biomass. Lane 2 contains purified LmACDH.

245

246 We screened clarified lysates of the ACDH homologs for the ability to oxidize NADH in the  
247 presence of ACS, ATP, CoA, and 50mM formate. We initially screened 9 ACDH homologs and  
248 then used those results to choose 37 more (Figure S1). From the full set of 46 homologs, we  
249 found 9 with activity significantly higher than empty vector at a 5% false discovery rate (Figure  
250 4A, S8A; t-test with Benjamini-Hochberg correction). Five homologs had higher activity than  
251 LmACDH (Figure 4A, colored bars). We then purified the 4 homologs with highest lysate activity  
252 as well as LmACDH and assayed them in 50mM and 250mM formate with excess ACS. Unlike  
253 in our ACS screen, all the ACDH homologs with higher lysate activity than LmACDH also had  
254 higher activity after normalizing by enzyme concentration, with PtACDH having the highest  
255 activity in both assays (normalized activity of  $0.93 \pm 0.04 \text{ s}^{-1}$  in 250mM formate; Figure 4D,  
256 S8B). All homologs were more active in 250mM formate than in 50mM. Their relative rankings  
257 were unchanged by formate concentration, except for BwACDH, which is the least active in  
258 50mM formate but among the most active homologs at 250mM. This suggests that it has a  
259 higher  $K_m$  for formyl-CoA than other homologs.

260 To engineer LmACDH, we used its crystal structure 3k9d along with a propionyl-CoA substrate  
261 superimposed from a related structure 5jfn to choose positions close to the acyl moiety for  
262 mutagenesis. We screened site-saturating libraries at 5 positions and identified a mutant A252S  
263 (LmACDH1) with increased activity (Table 1). We then screened some of the same positions on  
264 top of the LmACDH1 background, as well as additional residues close to A252 in the structure,  
265 and found A252S S253C (LmACDH2) to have even higher activity ( $1.00 \pm 0.07 \text{ s}^{-1}$  at 250mM  
266 formate, or 2.5-fold higher than LmACDH; Figure 4D). In fact, LmACDH2 has slightly higher  
267 activity than PtACDH, the best homolog we discovered.

268 **Expression of pathway in *M. flagellatus* KT**

269 Having identified ACSs with improved expression and ACDHs with increased activity, we next  
270 asked whether these enzymes could support formate reduction *in vivo*. Methylotrophic bacteria  
271 are able to assimilate formaldehyde as an intermediate of methanol, and those that do this via  
272 the RuMP pathway cannot natively assimilate formate. Therefore, if we introduced ACS and  
273 ACDH activities into an RuMP methyloph (which also had an NADH-producing FDH), this  
274 would in principle confer partial or complete formatotrophy. In practice, our enzymes are likely  
275 too inefficient to support growth, but even a low flux from formate into biomass could potentially  
276 be used to select for further enzyme improvements.

277 We chose the betaproteobacterium *Methylobacillus flagellatus* KT to express the pathway  
278 because it assimilates methanol via the RuMP pathway, grows robustly under standard  
279 laboratory conditions, and is amenable to genetic manipulation (26). We first tested a panel of  
280 promoters for their ability to drive high constitutive expression of a red fluorescent protein  
281 reporter from a IncP-based broad-host-range plasmid in *M. flagellatus* KT (27) (Figure S9).  
282 Based on this, we chose to use the native promoters Phps and PmxαF to drive ACS and ACDH  
283 expression, respectively, from the plasmid. We cloned a panel of expression vectors containing  
284 different ACSs coexpressed with the same ACDH, or vice versa, and conjugated them into *M.*  
285 *flagellatus* KT (Figure 5A; Materials and Methods).



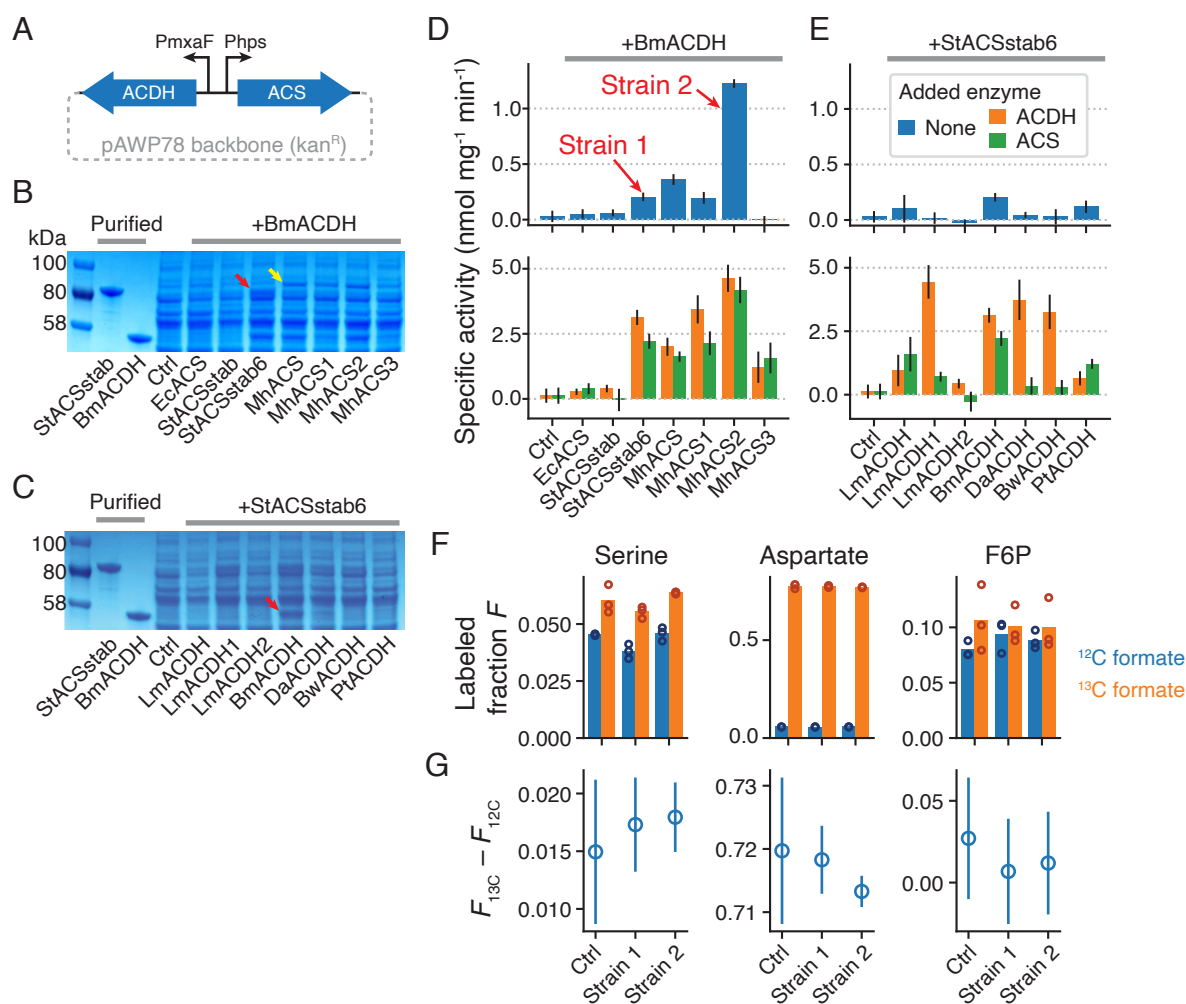

286

287 **Figure 5. ACS and ACDH are expressed and active in *M. flagellatus* KT lysates but do not**  
 288 **assimilate formate *in vivo*.**

289 A) Schematic of vector used to express ACS and ACDH variants in *M. flagellatus* KT. PmxαF and Phps  
 290 are native promoters (see also Figure S9). B) SDS-PAGE of clarified lysates from *M. flagellatus* KT  
 291 strains expressing different ACSs, as well as BmACDH, from the expression vector. Control strain (“Ctrl”)  
 292 contains the same vector, but with a pJ23101-dTomato insert instead of ACS/ACDH enzymes. Red  
 293 arrow: gel band for StACSstab6; yellow arrow: gel band for MhACS. C) Same as (B), but for different  
 294 ACDHs co-expressed with StACSstab6. Red arrow: gel band for BmACDH. D) Specific activity of *M.*  
 295 *flagellatus* KT lysates for formaldehyde production from 300mM formate, for various ACSs co-expressed  
 296 with BmACDH (mean and s.d. from 3 technical replicates; see Materials and Methods, Figure S10).  
 297 Results for cell lysates only (blue bars) or with 4μM purified ACDH (orange bars) or ACS (green bars)  
 298 added. E) Same as (D), but for various ACDHs co-expressed with StACSstab6. “Strain 1” and “Strain 2”  
 299 were chosen for <sup>13</sup>C labeling. F) Fraction of <sup>13</sup>C-labeled proteinogenic serine, aspartate, or fructose-6-

300 phosphate (F6P) from cells grown in methanol + 200mM  $^{12}\text{C}$  or  $^{13}\text{C}$  formate. 3 biological replicates of the  
301 control strain and 2 different pathway variants (“Strain 1” and “Strain 2” from (D)) were assayed. Bars  
302 show the mean. G) The difference in  $^{13}\text{C}$ -labeled fraction between  $^{13}\text{C}$ -formate-grown cells and  $^{12}\text{C}$ -  
303 formate-grown cells (mean and s.d.,  $n=3$ ). If  $^{13}\text{C}$  formate were being assimilated by the pathway, then the  
304 pathway-containing strains should have a higher value of this difference than the control strain.

305 To test for expression and activity of our enzymes in *M. flagellatus* KT, we analyzed clarified  
306 lysates by SDS-PAGE and Nash assay (28), which measures formaldehyde production (Figure  
307 S10; Materials and methods). Formaldehyde is only produced from formate if both ACS and  
308 ACDH are active, so we assayed lysates with and without an added excess of purified ACS or  
309 ACDH to detect activity of each enzyme individually (Figure 5D,E). This also has a side benefit  
310 of boosting the sensitivity of the assay. Independent *M. flagellatus* KT transconjugants varied in  
311 phenotype (growth rates, enzyme activities), so for each vector we screened multiple  
312 transconjugants and picked the one with the highest enzyme activity for further characterization.

313 We found that StACSstab6 and all MhACS variants, but not EcACS or StACSstab, had a visible  
314 band in SDS-PAGE when expressed in *M. flagellatus* KT. MhACS has a higher-molecular-  
315 weight band than StACSstab6, reflecting their predicted molecular weights (74 and 72 kDa,  
316 respectively). Consistent with the SDS-PAGE, the Nash assay only showed ACS activity in  
317 StACSstab6 and MhACS variants (orange bars in Figure 5D, lower panel). Across ACDHs, only  
318 BmACDH had visible SDS-PAGE expression. It also had the highest ACDH activity by Nash  
319 assay, although LmACDH, LmACDH1, and PtACDH also had above-background activities  
320 (green bars in Figure 5E, bottom panel). The strains with the highest lysate activity without any  
321 added enzymes are those containing BmACDH and either StACSstab6, MhACS, MhACS1, or  
322 MhACS2. Notably, neither EcACS nor the LmACDH variants, which were used in the previous  
323 version of the pathway (8), were well-expressed in *M. flagellatus* KT. We chose the strains  
324 containing StACSstab6/BmACDH (“Strain 1”), which had the 3rd-highest activity ( $0.20 \pm 0.04$

325 nmol mg<sup>-1</sup> min<sup>-1</sup>; Figure 5D), and MhACS2/BmACDH (“Strain 2”), which had the highest activity  
326 (1.22 ± 0.04 nmol mg<sup>-1</sup> min<sup>-1</sup>), for further characterization.

327 Some strains with the same ACDH or ACS differed in their apparent activities for that enzyme in  
328 the Nash assay. This could be due to cryptic variation between transconjugants, or some  
329 interaction between the divergent Phps and PmxaF promoters. The latter might explain why, for  
330 example, across the MhACS variants in Figure 5D, ACDH activity seems to vary and correlate  
331 with ACS activity even though the ACDH enzyme is the same. We verified that the sequence of  
332 the promoters and enzyme genes on the expression vector are as expected in every strain.  
333 Therefore, any cryptic genetic variation would have to be in the genome of the host strain.

#### 334 **Test for formate assimilation in *M. flagellatus* KT**

335 Given the observed activity of ACS and ACDH in *M. flagellatus* KT lysates, we next tested for  
336 assimilation of formate into biomass. To do this, we cultured Strain 1 and Strain 2 in <sup>12</sup>C- or <sup>13</sup>C-  
337 formate and monitored <sup>13</sup>C labeling of metabolites via liquid chromatography and mass  
338 spectrometry (LC-MS). Because *M. flagellatus* KT contains formate dehydrogenases capable of  
339 oxidizing formate to CO<sub>2</sub>, which can potentially be reassimilated via carboxylation, we also  
340 assayed a control strain containing an dTomato-expressing vector. If formate is being  
341 assimilated into biomass via our pathway, we should observe more <sup>13</sup>C labeling in central  
342 carbon metabolites and proteins in a pathway-containing strain relative to the control strain, and  
343 only when labeled formate is provided.

344 First, we analyzed proteinogenic amino acids as an indicator of overall incorporation of formate  
345 into biomass. We inoculated control and pathway strains into MM2 medium with 0.2% <sup>12</sup>C  
346 methanol and 200mM <sup>12</sup>C or <sup>13</sup>C-formate, harvested the saturated cultures, and acid-hydrolyzed  
347 the biomass for LC-MS. We found almost no labeling of more than one carbon atom across the

348 amino acids examined, so we used total  $^{13}\text{C}$ -labeled fraction, or  $1 -$  unlabeled fraction, as a  
349 simple metric for the degree of labeling (Figure 5F, S11). Serine, whose carbon atoms are  
350 derived from pyruvate and thus immediately downstream of the RuMP pathway, displayed a  
351 background  $^{13}\text{C}$ -labeled fraction of about 4% in  $^{12}\text{C}$ -formate across all strains, but a 1.5 - 2%  
352 increase in labeling in  $^{13}\text{C}$ -formate (Figure 5F). However, this increase occurred in both control  
353 and pathway strains and was similar in magnitude (Figure 5G), indicating that the extra labeling  
354 is not due to formate assimilation via our pathway. Aspartate had much higher labeling in  $^{13}\text{C}$ -  
355 formate than in  $^{12}\text{C}$ -formate, although the differential labeling was again the same in all strains  
356 (Figure 5F,G, middle panel). Since aspartate is derived from oxaloacetate, the high labeled  
357 fraction in  $^{13}\text{C}$ -formate is possibly due to re-assimilation of  $^{13}\text{CO}_2$  by pyruvate carboxylase after  
358 formate oxidation by formate dehydrogenases (29). A similar jump in labeling in  $^{13}\text{C}$ -formate  
359 was observed for threonine and glutamate, which can both be derived from aspartate (Figure  
360 S11B,C). Alanine, on the other hand, had <5% labeling in  $^{13}\text{C}$ -formate like serine, consistent  
361 with also being derived from pyruvate (Figure S11B,C). Overall, no amino acid examined had  
362 labeling indicative of formate assimilation by the introduced pathway.

363 The analysis above requires a sufficiently high formate reduction flux to result in labeled  
364 proteins. For a more sensitive test of formate assimilation, we monitored fructose-6-phosphate  
365 (F6P), a metabolite immediately downstream of formaldehyde assimilation into the RuMP  
366 pathway. We added 200mM  $^{12}\text{C}$ - or  $^{13}\text{C}$ -formate to mid-exponential-phase cultures of control  
367 and pathway strains, continued incubating the cultures for 2 hours, and then harvested and  
368 extracted metabolites for LC-MS. We saw 8-10% labeling of F6P in  $^{12}\text{C}$ -formate, close to the  
369 expected background rate of 6% (Figure 5F, right panel). Labeling in  $^{13}\text{C}$ -formate was higher, at  
370 around 10% in all 3 strains. However, as in the case of the amino acids, there was no increase

371 in the difference in labeling between labeled and unlabeled formate conditions (Figure 5G, right  
372 panel). Therefore, we were unable to detect evidence of our pathway assimilating formate into  
373 biomass *in vivo*.

374 It is possible that our ACS and ACDHs still do not have the activity needed to supply even  
375 detectable formaldehyde flux through the RuMP pathway. To test this, we used flux balance  
376 analysis (FBA) to calculate the theoretical growth rate that could be supported by the measured  
377 rate of formate reduction in the Nash assay. A genome-scale model of *M. flagellatus* KT  
378 metabolism does not exist, but we used a model developed for another RuMP-pathway  
379 methylothermophile, *Methylothermobacterium boryatense* 5GB1C (30). We assumed that the flux through  
380 the methanol dehydrogenase reaction, which provides all the formaldehyde (and reduced  
381 carbon) for biomass production, is the same as the highest specific activity we measured in *M.*  
382 *flagellatus* KT lysates, or 1.2 nmol/min/mg (Figure 5D). We found that this would support a  
383 theoretical growth rate of 0.00048 h<sup>-1</sup>, or a doubling time of 8.6 weeks, even without ATP  
384 maintenance (with ATP maintenance, growth was infeasible). This is much slower than even the  
385 55-hour growth supported by an unoptimized reductive glycine pathway (9), indicating that  
386 further improvements to activity and/or expression are needed.

## 387 Discussion

### 388 Utility of phylogenetically diverse enzymes

389 Previous work showed that EcACS and LmACDH have formate-reduction activity and that the  
390 enzymes are functional when expressed in *E. coli*. We extend that work to identify a panel of  
391 natural and engineered ACS and ACDH variants with improved expression and lysate activity  
392 and show that StACSstab6, MhACS2, and BmACDH, are well-expressed and active in the  
393 methylothermophile *M. flagellatus* KT. None of these three enzymes had the highest ACS or ACDH

394 activities *in vitro*, showing that expression in the host cytosolic environment is an equally if not  
395 more important factor than catalytic properties in practice. The computational design of  
396 StACSstab and the thermophilic source organisms of MhACS and BmACDH may have played a  
397 role in their greater expression and host range. By contrast, neither EcACS and LmACDH, the  
398 previous best enzymes for this pathway, were expressed in *M. flagellatus* KT, despite EcACS  
399 having the 2<sup>nd</sup>-highest formate  $k_{cat}/K_m$  of the wildtype ACSs and LmACDH2 being the most  
400 active ACDH we found. This highlights a key advantage of screening phylogenetic diversity in  
401 that this approach offers not only the chance to discover high activity, but also high expression  
402 and evolvability (20,31,32).

#### 403 **Improving expression versus activity**

404 Since we performed directed evolution on ACSs using a lysate-based screen, it is reassuring  
405 that we obtained increased lysate activity (5.8-fold for StACSstab and 1.9-fold for MhACS).  
406 However, this was entirely due to increases in functional expression (8-fold for StACSstab and  
407 4.6-fold for MhACS) and not catalytic efficiency. In fact,  $k_{cat}/K_m$  decreased by 28% for  
408 StACSstab6 on formate, although it decreased by 72% on acetate, leading to an overall  
409 increase in the formate specificity from the parent enzyme. Despite this lack of improvement in  
410 catalytic activity, the increased soluble expression proved crucial to functionality in *M. flagellatus*  
411 KT, where StACSstab6, but not the StACSstab parent, was expressed and active. Interestingly,  
412 even wildtype ACS homologs differed widely in soluble expression in *E. coli* as well as in *M.*  
413 *flagellatus*. By contrast, there were no obvious differences in expression between the various  
414 ACDH homologs or evolved variants in *E. coli*, and our directed evolution of ACDH using a  
415 lysate-based assay led to increases in both lysate and specific activity.

416 Why did our lysate assays select for increased specific activity in ACDH but not in ACS? The  
417 ACS parents we chose perhaps started with poor stability or expression, but this is unlikely  
418 given their origins . Moreover, stability usually *decreases* while evolving for activity (33). A more  
419 likely possibility is that ACS activity is toxic. This has been observed previously (34), and thus  
420 decreasing it may allow cells to tolerate increased expression. This is consistent with the  
421 expression gain concomitant with a sudden reduction of acetate activity from StACSstab to  
422 StACSstab1/2 (N521V/L). Despite having a much lower acetate activity, however, even  
423 StACSstab6 still appears to be toxic, frequently leading to *E. coli* colonies with spontaneously  
424 decreased activity (one such colony can be seen as a replicate in Figure 3B). This problem can  
425 be mitigated in future rounds of evolution by using a low-background expression host and/or  
426 reducing induced expression level.

#### 427 **Challenges of one-carbon substrates**

428 A more fundamental problem is the possibility of biophysical limits on the formate activity of  
429 ACS. We chose ACS for synthesizing formyl-CoA because formate is structurally similar to  
430 ACS's native substrate acetate. However, formate is less electrophilic than acetate, which could  
431 make it challenging to achieve a high  $k_{cat}$ . Indeed, formate  $k_{cat}$ s among our natural and evolved  
432 ACSs never exceeded  $12 \text{ s}^{-1}$ , while the highest acetate  $k_{cat}$  was  $43.2 \pm 3.1 \text{ s}^{-1}$ . One-carbon  
433 compounds also have relatively few functional groups for interacting with a substrate-binding  
434 pocket, leading to higher  $K_m$ s (35) and potentially explaining why even our lowest ACS  $K_m$  for  
435 formate is greater than 40mM. As a result, our highest formate  $k_{cat}/K_m$  values are between 100-  
436  $200 \text{ M}^{-1}\text{s}^{-1}$ , 2-3 orders of magnitude lower than many natural enzymes, including the acetate  
437 activity for native ACSs. Encouragingly, however, natural enzymes find formate equally  
438 challenging. The *M. extorquens* formate-tetrahydrofolate ligase (FTL), which activates formate

439 for assimilation, has a  $K_m$  of 22 mM and a  $k_{cat}$  of  $\sim 100\text{ s}^{-1}$ , for a  $k_{cat}/K_m$  of  $\sim 5000\text{ M}^{-1}\text{s}^{-1}$ , about 30-  
440 fold higher than our best ACSs (36). Despite being 2 orders of magnitude lower than the median  
441 enzyme (35), this activity can support fully formatotrophic growth in natural and engineered  
442 pathways. Therefore, a physiologically relevant activity of the formate reduction module may be  
443 within reach given further enzyme engineering.

444 ACDH is not expected to be as challenging an engineering target as ACS, because most of the  
445 substrate binding affinity is contributed by the CoA group. We did not directly measure the  $K_m$  of  
446 ACDH for formyl-CoA, but the ACS-coupled assays show it is at most 7 mM (Figure S7). In  
447 reality it is probably much lower; the  $K_m$  of ACDH for acetyl-CoA can be  $<100\mu\text{M}$  (37), and the  
448  $K_m$  of 2-hydroxyacyl-CoA lyase for formyl-CoA is  $200\mu\text{M}$  (15), despite this not being its native  
449 substrate. However, a potential problem with ACDH is  $k_{cat}$ . Even though the fastest ACDH  
450 homolog in the literature has a  $k_{cat}$  of  $\sim 60\text{ s}^{-1}$  on acetate (38), our best ACSs were almost 2  
451 orders of magnitude slower on formate. However, given that we were able to increase this value  
452 by  $\sim 2$ -fold in 2 rounds of directed evolution, further engineering will likely result in additional  
453 gains.

#### 454 **Effects of mutations on ACS and ACDH**

455 Previous work found that ACS substrate specificity can be changed from acetate to larger or  
456 more polar substrates by mutating V310, T311, V386, or W414 in StACS, which are all within  $4\text{Å}$   
457 of the acetyl moiety (20,22,23). However, for formate, we did not find increases in lysate activity  
458 when mutating V310, T311, or V386 in isolation or V310 and V386 combinatorially (Table 1).  
459 Instead, we found that the previously unexplored N521V/L mutations cause a large decrease in  
460 acetate activity in StACSstab. In the 2p2f structure of StACS, acetate is modeled in the active  
461 site with its acetyl carbon pointed toward N521,  $5.7\text{Å}$  away from the asparagine's sidechain



462 carbonyl (23). This orientation is consistent with the ability of large hydrophobic substitutions at  
463 N521 to favor a smaller acyl moiety in the substrate.

464 Several other mutations increased ACS lysate activity while decreasing acetate  $k_{cat}/K_m$ .  
465 StACSstab F260W and W414F increased acetate  $K_m$ , as can be seen by comparing  
466 StACSstab3 and StACSstab4 to StACSstab1. In the StACS structure, W414 is within 4 Å of the  
467 acyl substrate, while F260 is 10.9 Å away but in contact with the first-shell V310 sidechain  
468 (Figure 3A). MhACS Y499V decreased acetate  $k_{cat}$ ; it is 11.1 Å from the acyl substrate but  
469 contacts the backbone of W414. The homologous StACSstab Y496 had mutants among the top  
470 hits in the first round of directed evolution (Figure S5B), but was not pursued in favor of N521V.  
471 StACSstab G524 lines the CoA binding site in StACSstab and as a result, G524S/L is known to  
472 block CoA addition to the acyl group(23). Our results show that G524A, on top of N521V  
473 W414F, maintains formate activity while increasing acetate  $K_m$ . Additional residues (e.g. F421)  
474 showed evidence of improved activity in our initial screens on StACSstab (Figure S5), but were  
475 not pursued fully. They are prime candidates for mutagenesis in future rounds of evolution.

476 Over two rounds of site-saturating mutagenesis and screening at 9 residues comprising the  
477 acyl-binding tunnel in LmACDH, we found a double-mutant LmACDH2 (A252S S253C) that  
478 contributed to improved activity on formyl-CoA. These positions partially overlap with those  
479 mutagenized in a recent effort to engineer an ACDH to reduce glycolyl-CoA to glycolate (20).  
480 Our evolved isolates were comparable in activity to the best natural homologs BmACDH and  
481 PtACDH, but ultimately only BmACDH expressed well in *M. flagellatus* KT. BmACDH has the  
482 same sequence as LmACDH at positions homologous to A252 and S253, so these are clear  
483 candidates for mutagenesis in future directed evolution efforts.

#### 484 ***M. flagellatus* KT as an *in vivo* pathway testing platform**

485 We chose to use *M. flagellatus* KT for testing *in vivo* activity of our pathway because it could  
486 potentially gain formatotrophy with only the expression of ACS and ACDH. This is the first  
487 published instance, to our knowledge, of metabolic engineering in this organism. Recently, an *E.*  
488 *coli* strain was engineered to grow on methanol as a sole carbon source via the RuMP pathway  
489 (39). This provides the alternative option of engineering the ACS/ACDH pathway in *E. coli*  
490 instead, which would allow access to a wider range of genetic tools and pathway manipulations  
491 (40). Most importantly, it would allow the improvements we obtain from directed evolution in *E.*  
492 *coli* lysates to be directed translated into *in vivo* activity or expression. However, even in the fully  
493 methylotrophic *E. coli*, formaldehyde toxicity is still a major problem, and perhaps as a result, its  
494 doubling time on methanol is more than 8 hours. By contrast, *M. flagellatus* KT has a doubling  
495 time of 2 hours on methanol, indicating its naturally evolved robustness against formaldehyde  
496 toxicity. Perhaps the best approach in future work is to use a combination of strains – *E. coli* for  
497 initial troubleshooting and improvement of enzymes, followed by *M. flagellatus* KT for fine-tuning  
498 for maximal flux.

#### 499 **Conclusion**

500 Through phylogenetic homolog screening and directed evolution, we identified a panel of highly  
501 expressed and active ACS and ACDH enzymes and gained insight into the genetic  
502 determinants of their acyl-substrate specificity. We established a plasmid-based expression  
503 system in the RuMP-pathway methylotroph *M. flagellatus* KT and used it to introduce a formate-  
504 reduction pathway in an attempt to confer synthetic formatotrophy. Although we ultimately did  
505 not observe *in vivo* formate assimilation via our pathway, the enzymes and insights from this

506 work should enable continued improvement of this pathway toward the ultimate goal of efficient  
507 conversion of CO<sub>2</sub> into value-added chemicals.

508

## 509 Materials and Methods

### 510 **Bioinformatics and enzyme homolog selection**

511 All bioinformatics and analysis/visualization of experimental data was performed in  
512 Python/Jupyter. Phylogenetic trees for figures were computed by FastTree (41) and visualized  
513 using iTOL (42).

514 To identify ACS homologs for testing, an initial candidate list of 8,911 sequences was compiled  
515 that included: 6,104 sequences from the “Acetate-CoA ligase” Interpro family (IPR011904)(43)  
516 with the same 3 domains as EcACS downclustered to 90% identity using CD-HIT (44); 2,790  
517 sequences from RefProt based on a pHMMER search (E-value <  $10^{-200}$ ) with query EcACS  
518 (P27550) (45); 17 experimentally characterized ACS homologs from BRENDA (EC 6.2.1.1) (46).

519 From the initial candidate list, an alignment and distance matrix was generated using Clustal  
520 Omega (47), and a hierarchical clustering of the distance matrix was used to guide manual  
521 selection of a diverse final set of ACSs. Initially 11 ACSs were chosen for testing (see below for  
522 details). Then, given the results of the 1<sup>st</sup> round of testing, 30 additional ACSs were chosen to  
523 further sample clades with high activity while also exploring new areas of sequence space.

524 For ACDHs, 7,646 sequences were obtained from UniProt via a pHMMER search (E-value <  
525  $7 \times 10^{-17}$ ) with query LmACDH (Q8Y7U1) or enzyme commission number search (EC 1.2.1.10),  
526 or from BRENDA (EC 1.2.1.10). After alignment and clustering of ACDHs, mhpF-like sequences  
527 were removed, leaving 4,037 adhE-like sequences from which the final selection was made.

528 Initially 9 ACDHs were chosen for testing; then these results were used to choose 37 additional  
529 ACDHs to test.

530 The full phylogeny of all ACSs and ACDHs considered for homolog discovery would be too  
531 large to visualize as a tree, so Figure S1 shows only untested sequences that have less than

532 50% (ACSs) or 40% (ACDHs) amino-acid identity to each other and to the tested homologs.

533 Some of the tested homologs are more similar to each other than this because they were

534 chosen for reasons other than diversity; these were all included in the trees.

### 535 **DNA synthesis and *E. coli* strain construction**

536 ACS and ACDH sequences were codon optimized for *E. coli* expression using Integrated DNA

537 Technologies' online tool (<https://www.idtdna.com/CodonOpt>; accessed September 2018). DNA

538 synthesis was performed at Twist or the Joint Genome Institute of the U.S. Department of

539 Energy. Genes were cloned into vector pET29b+ between *NdeI* and *XhoI* such that expressed

540 enzymes have a C-terminal 6xHis tag. Expression vectors with ACDH genes were

541 electroporated into *E. coli* expression strain BL21\*(DE3), propagated on lysogeny broth (LB) +

542 50ug/mL kanamycin, and stored at -80C in 25% glycerol.

543 ACS is known to be repressed under standard physiological conditions by acetylation at K609,

544 but can be derepressed by a point mutation L641P (48). We found that a simpler method of

545 knocking out the *patZ* deacetylase leads to comparable EcACS activity (Figure S2A), so we

546 used a BL21\*(DE3)  $\Delta$ *patZ* host strain for all ACS experiments. The *patZ* gene was deleted from

547 BL21\*(DE3) using lambdaRed recombinase (49). For the round of directed evolution from

548 MhACS2 to MhACS3, the alternate expression strain NovaBlue(DE3)  $\Delta$ *patZ* was constructed

549 and used.

### 550 **Protein expression, lysis, and SDS-PAGE**

551 To express proteins, strains were inoculated directly from -80C stocks into auto-induction

552 medium (50) at 1:500 to 1:50,000 dilution and incubated at 37C for 24 hours. For screening,

553 500 $\mu$ L cultures were grown in 2mL 96-well microtiter plates (Axygen P-DW-20-C) with shaking

554 at 1000rpm on a benchtop shaker (Heidolph Titramax 1000) in a temperature-controlled room.

555 For SDS-PAGE and Nash assays, 5mL cultures were grown in round-bottom glass tubes in a  
556 rotary shaker incubator at 250rpm. For purification, 50mL or 500mL cultures were grown in  
557 Erlenmeyer flasks and shaken at 250rpm.

558 To prepare lysates for screening, 96-well plate cultures were pelleted at 2200g for 10 min,  
559 washed once in 4°C water, and resuspended by vortexing after adding 300 $\mu$ L/well of lysis buffer  
560 (50mM HEPES pH 7.5, 50mM NaCl, 2 mM MgCl<sub>2</sub>) with 0.6 mg/ml lysozyme, 0.1mg/mL  
561 polymyxin B, and 1:50,000 Sigma benzonase nuclease. Plates were incubated at 37°C for 50  
562 min without shaking followed by 10 min shaking at 1000rpm. Then, lysates were pelleted at  
563 2200g for 10 min, and the supernatant was used for downstream assays.

564 To prepare lysates for SDS-PAGE, Nash assay, or protein purification, 5mL, 50mL, or 500mL  
565 cultures were pelleted at 4000rpm for 10min and resuspended, respectively, in 0.5mL, 8mL, or  
566 30mL lysis buffer with 0.1mM DTT, 1:500 Sigma protease inhibitor cocktail, 1:50,000 Sigma  
567 benzonase nuclease. Cell suspensions were sonicated on ice (Branson SLPt) for 3 repeats of  
568 10 seconds on and 10 seconds off at 30% amplitude for 5mL cultures, or 6 repeats of 30  
569 seconds on and off at 70% amplitude for 50mL cultures, or 12 repeats of 30 seconds on and off  
570 at 70% amplitude for 500mL cultures. Lysates were pelleted at 4000rpm for 15 minutes and the  
571 supernatant used for analysis or purification.

572 To analyze lysates and purified enzymes by SDS-PAGE, samples were mixed 1:1 with 2x  
573 Laemmli sample buffer with 2-mercaptoethanol (Bio-Rad) and boiled for 10min. A sample  
574 containing 1-20 $\mu$ g of protein was loaded into a 4-15% precast gel (Bio-Rad Mini-ProTEAN) and  
575 run at 60V for 20min followed by 160V for 1 hour. To compare expression levels across lysates,  
576 protein concentration was determined by BCA and equal  $\mu$ g of protein were loaded in each

577 lane. Gels were stained by Coomassie blue and imaged using a digital camera. Minor contrast  
578 adjustments were made to the images to improve visibility of bands.

### 579 **Assays for enzyme activity in lysates**

580 ACS was assayed in lysates using a discontinuous assay with DTNB (5,5-dithio-bis-(2-  
581 nitrobenzoic acid)), which reacts with CoA to yield absorbance at 412nm (20,51). In a microtiter  
582 plate (Corning Costar 3370), 100 $\mu$ L of reaction buffer (10  $\mu$ L of expression-induced *E. coli*  
583 lysate, 50mM HEPES pH 7.5, 2mM MgCl<sub>2</sub>, 5mM ATP, 0.5mM CoA, and 50mM sodium formate)  
584 was aliquoted. The formate was added last to start the reaction, everything was incubated for  
585 10min at 37°C, then stopped by adding 100 $\mu$ L DTNB reagent (50mM HEPES pH 7.5, 2mM  
586 DTNB). Absorbance at 412nm was read on a plate reader (Molecular Devices Spectramax 190).  
587 Empty vector control lysates were used to establish the background signal, and the metric  
588  $\Delta A_{412} = A_{412}_{Empty\ vector} - A_{412}$  was used to quantify lysate ACS activity. Note that higher  
589 ACS activity corresponds to lower  $A_{412}$  but higher  $\Delta A_{412}$ . For the first round of ACS directed  
590 evolution, a continuous assay was used (see “Protein purification and enzyme kinetics” below),  
591 but subsequent rounds of evolution used the discontinuous assay described above.

592 ACDH lysates were assayed in a continuous assay by coupling to ACS, all steps at 37°C.  
593 Reactions were performed in a microtiter plate with a total volume 200 $\mu$ L containing 2 $\mu$ L  
594 clarified lysate, 2 $\mu$ M StACSstab1, 50mM HEPES pH 7.5, 5mM MgCl<sub>2</sub>, 1mM DTT, 2.5mM ATP,  
595 0.5mM CoA, 0.6mM NADH, and 50mM formate. Reactions were prepared in 100 $\mu$ L at 2x  
596 concentration and then 100 $\mu$ L of 2x formate was added to start the reaction. Absorbance at  
597 340nm was monitored and NADH concentration was calculated as  $[NADH] = \frac{A_{340}}{\epsilon \cdot l}$ , where  $\epsilon =$   
598  $6.22\text{ mM}^{-1}\text{cm}^{-1}$  is the extinction coefficient of NADH and  $l = 0.56\text{ cm}$  is the path length of  
599 200 $\mu$ L of reaction mixture in the microtiter plate. Initial velocities were calculated from least-

600 square linear fits to the first 3-10 datapoints. The amount of ACS to use for coupling was  
601 determined by titrating ACS for every new batch of purified ACS or round of lysate screening  
602 (Figure S5). For assaying purified ACDHs, we used 30x molar excess of coupling ACS.

### 603 **Directed evolution to improve ACS and ACDH**

604 To engineer StACSstab and MhACS, residues were selected for site-saturating mutagenesis  
605 based on proximity to the acetate molecule in the crystal structure of the *Salmonella*  
606 *typhimurium* ACS (PDB: 2p2f). Mutant libraries at single positions were constructed using  
607 “inside-out” PCR from NNK or “22c” (52) degenerate primers and multi-site combinatorial  
608 libraries were made by overlap-extension PCR. Libraries were electroporated into expression  
609 host strains (see above). One 96-well plate of mutant clones (plus control strains) was screened  
610 for each single-site library. Eight plates were screened for the 4-site library in MhACS evolution  
611 round 1. The best 10-20 mutants were restreaked on LB + kan plates and 4 colonies of each  
612 mutant were screened again. The best mutant from the secondary screen was used as the  
613 parent for the next round of evolution. The DTNB assay with 50mM formate was used for all  
614 screening all ACS mutants, except in round 1 of StACSstab evolution, when the myokinase  
615 coupled assay was used. To engineer LmACDH, its crystal structure (3k9d) was superimposed  
616 on the *R. palustris* ACDH (5jfn) (53), and the position of the substrate propionyl-CoA from 5jfn  
617 was used to choose residues in 3k9d for saturation mutagenesis. Screening was done using the  
618 ACS-coupled assay described above on clarified lysates at 50mM formate.

### 619 **Protein purification and enzyme kinetics**

620 All steps were done at 4°C. 1mL of Ni-NTA superflow resin (Qiagen) was placed in a gravity-  
621 flow column (GE Healthcare PD-10) and equilibrated by flowing through 10mL of lysis buffer.  
622 Then 8mL of clarified lysate was added and the column was sealed and placed on ice and



623 nutated (VWR 12620-916) for 10 minutes. Then the lysate was flowed through the column,  
624 10mL of wash buffer (50mM HEPES pH 7.5, 300mM NaCl, 35mM imidazole) was applied, and  
625 protein was eluted in 10mL of elution buffer (50mM HEPES pH 7.5, 50mM NaCl, 150mM  
626 imidazole). Eluate was exchanged to lysis buffer by spinning at 4000g for 15min in Amicon  
627 Ultra-15 30kDa (for ACS) or 10kDa (for ACDH) centrifugal filters. Glycerol was added to 10%  
628 and protein concentration was determined by BCA assay (Pierce 23227). Kinetic assays were  
629 performed immediately after purification. Additional purified enzyme was split into aliquots and  
630 stored at -20°C.

631 For the first round of ACS directed evolution, a secondary screen was performed with high-  
632 throughput purification. 1mL cultures of *E. coli* expression strains were lysed in 300 $\mu$ L lysis  
633 buffer + 1:50,000 benzonase + 0.6mg/mL lysozyme + 0.1mg/mL polymyxin B and clarified  
634 lysates were flowed over 50 $\mu$ L Ni-NTA superflow resin in each well of a 96-well filter plate (Pall)  
635 and by centrifugation at 2200g for 10 min. The resin was washed with 200 $\mu$ L of wash buffer and  
636 eluted in 100 $\mu$ L elution buffer. Eluates were used immediately without buffer exchange and  
637 protein was quantified by BCA.

638 ACS kinetics were determined by a continuous assay using coupling enzymes (23,51). All steps  
639 were performed at 37°C. All coupling enzymes were from Sigma. A reaction buffer was  
640 prepared with 0.05 – 0.2 $\mu$ M of ACS, 15 U/mL pyruvate kinase, 23 U/mL lactate dehydrogenase,  
641 and 25 U/mL myokinase in 50mM HEPES pH 7.5, 5mM MgCl<sub>2</sub>, 1mM DTT, 0.6mM NADH,  
642 2.5mM phosphoenolpyruvate, 2.5mM ATP, and 0.5mM CoA. 100 $\mu$ L of a 2x portion of the  
643 reaction mixture was aliquoted into a microtiter plate and the reaction started by adding 100 $\mu$ L  
644 of 2x sodium formate or acetate. Absorbance at 340nm was monitored for 10 minutes on the  
645 plate reader and initial velocities of NADH oxidation were calculated as above. Kinetic

646 parameters  $k_{cat}$  and  $K_m$  were extracted from plots of initial velocities versus substrate  
647 concentration by fitting  $v = k_{cat} \frac{[S]}{[S]+K_m} + b$ , where  $v$  is the per-enzyme initial velocity,  $[S]$  is the  
648 substrate concentration, and  $b$  is a background rate. Kinetic curves were fit using  
649 `scipy.optimize.curve_fit`.

650 Purified ACDHs were assayed similarly to ACDH lysates as described above, except rates of  
651 NADH oxidation were normalized to enzyme concentration as determined by BCA.

### 652 **Cloning and *M. flagellatus* KT strain construction**

653 All genetic constructs for *M. flagellatus* KT expression were maintained on a IncP-based broad-  
654 host-range plasmid, whose backbone was derived from pAWP87 / pCM66 (27). Expression  
655 vectors for *M. flagellatus* KT were constructed using PCR amplified backbone fragments,  
656 promoters from the *M. flagellatus* KT genome, and ACS/ACDH coding regions from DNA  
657 synthesis. PCR primers were designed with 20-25bp of overlap and Gibson assembled (New  
658 England Biolabs) and electroporated into *E. coli* strain TOP10. Electrotransformants were  
659 propagated in LB + 50ug/mL kanamycin at 20°C to avoid toxicity of the constructs.

660 A rifamycin-resistant isolate of *M. flagellatus* KT was used for triparental conjugation. Briefly, *M.*  
661 *flagellatus* KT was patched, along with plasmid donor strain and helper strain pRK2073 (54),  
662 onto plates containing MM2 medium (14.5 mM K<sub>2</sub>HPO<sub>4</sub>, 18.8 mM NaH<sub>2</sub>PO<sub>4</sub> (monohydrus), 0.8  
663 mM MgSO<sub>4</sub> (heptahydrus), 3.8mM Na<sub>2</sub>SO<sub>4</sub>, 9.9mM KNO<sub>3</sub>, and 1x Vishniac trace elements  
664 (55)) with 5% LB and 2% methanol and incubated 16-20 hours at 37°C. Cell mixtures were then  
665 plated on plates with MM2 + 0.1% pyruvate + 2% methanol + 50ug/mL rifamycin + 50ug/mL  
666 kanamycin and incubated for 2-3 days at 37°C, colonies were restreaked onto the same  
667 medium and incubated for another 2-3 days at 37°C. For each conjugation, multiple colonies  
668 were screened and by SDS-PAGE and Nash assay and the colony with the best phenotype was

669 used for downstream assays. Strains were stored by culturing in liquid MM2 medium and then  
670 freezing at -80°C with 10% DMSO.

671 Promoter reporter constructs were constructed by Gibson assembly of various promoters  
672 upstream of dTomato in pAWP87. These were conjugated into *M. flagellatus* KT, colonies were  
673 inoculated into seed cultures in MM2 + 2% methanol + kanamycin, grown for 24-48 hours at  
674 37°C with shaking, diluted 1:50 and grown 24 hours, and then measured at 535nm excitation /  
675 590nm emission on a plate reader (Tecan Infinite 500). Four promoters (Phps, Pmx<sub>α</sub>F, Ptrc,  
676 Ptac) were chosen for driving ACS/ACDH, but intact plasmids with Ptrc and Ptac could not be  
677 isolated in the *E. coli* TOP10 cloning strain and were omitted from further experiments.

#### 678 **Nash assay**

679 *M. flagellatus* KT strains were patched from -80°C stocks onto MM2 + 2% methanol + 50ug/mL  
680 kanamycin (“MM2 Me2 kan”) plates and incubated at 37°C for 2 days, then inoculated into 5mL  
681 liquid MM2 Me2 kan medium in a round-bottom glass tube and incubated at 37°C with 250rpm  
682 shaking for 24 hours. Cultures were lysed as described above and the soluble fraction was used  
683 for the assay. In a microtiter plate, 8μL lysate was added to a reaction mixture (50mM HEPES  
684 pH 7.5, 5mM MgCl<sub>2</sub>, 1mM DTT, 4mM ATP, 6mM NADH, and 1mM CoA, either 4μM ACDH, 2μM  
685 ACS, or no additional enzyme, and either 0mM or 300mM formate) for 100μL total volume.  
686 Reactions were incubated for 1 hour at 37°C. Then 100μL of Nash reagent (0.1M ammonium  
687 acetate, 0.2% acetic acid, 3.89M acetylacetone) is added and reactions are incubated at 65°C  
688 for 30 min. Then, to precipitate proteins, 20μL of 100% w/v trichloroacetic acid is added and the  
689 reactions are placed on ice for 5 min. The plate is spun down at 2200g for 10min and 100μL of  
690 supernatant is transferred to a new plate and A412nm is measured. The difference between

691 absorbance at 300mM and 0mM formate,  $\Delta A_{412} = A_{412}_{300mM} - A_{412}_{0mM}$ , was used to  
692 quantify lysate activity.

### 693 **<sup>13</sup>C formate labeling and analysis by LC-MS**

694 To analyze proteinogenic amino acids, *M. flagellatus* KT strains were revived from -80°C and  
695 grown in 5mL liquid MM2 Me2 kan seed cultures as described above. 200μL of seed culture  
696 was transferred to 5mL of MM2 + kan + 0.05% methanol + 200mM <sup>12</sup>C or <sup>13</sup>C formate. Initial  
697 experiments used cultures with one growth cycle in MM2 + 2% methanol + 200mM formate.  
698 Later experiments used multiple growth cycles as follows. Cultures were grown for 24 hours,  
699 pelleted at 2200g for 10min, and resuspended in fresh medium with methanol and formate. This  
700 iterative re-feeding was done for 3 days, and the final cell pellets were resuspended in 1mL 6N  
701 hydrochloric acid and boiled in glass vials for 24 hours (56). The vials were uncapped and left to  
702 dry for another 24 hours. The biomass was then resuspended in 1mL of water, dried for 24  
703 hours, and then resuspended in 0.5mL of water and centrifuge-filtered (Costar Spin-X 0.22 μm,  
704 Sigma). Samples were stored at -20°C until LC-MS.

705 LC-MS was performed as in (57). A Waters Xevo mass spectrometry triple quad (Xevo, Waters,  
706 Milford, MA) with UPLC system equipped with a Zic-pHILIC column (SeQuant, PEEK 150 mm  
707 length × 2.1 mm metal free, with 5 μm polymeric film thickness, EMD Millipore) was used for  
708 detection of MID of metabolites with following LC condition. Mobile phase A is 20 mM  
709 bicarbonate in water (OPTIMA grade, Thermo Fisher Scientific), mobile phase B is 100%  
710 acetonitrile (OPTIMA grade, Thermo Fisher Scientific). The LC condition starts with 0.15 ml/min  
711 flow rate with initial gradient A = 15% for 0.5 min, the increased to 80% A in 20 min, at 21 min, A  
712 = 90%, and hold for 5 min, at 26.5 min, mobile phase A switched to 15% and then re-equilibrate  
713 the column for 5.5 min. Multiple reaction monitors (MRM) were set up for each metabolite of

714 interest. For each metabolite, <sup>12</sup>C chemical standards were used to set up the mass channel for  
715 unlabeled isotopomers. The predicted mass fragments were then used to predict the MRM for  
716 labeled isotopomers for each metabolite. The MassLynx software (Waters) was used to  
717 integrate ion peak intensities, with subsequent analysis in Python.

### 718 **Availability of Materials**

719 All strains and plasmids used in this study are available upon request from the authors, and all  
720 plasmids other than the homolog screening libraries have been deposited in Addgene.

### 721 **Acknowledgements**

722 We thank Yakov Kipnis, Devin Trudeau, Joseph Groom, Julius Palme, and Dan Tawfik for  
723 valuable technical advice and feedback on the manuscript.

### 724 **Data availability**

725 All homolog protein sequences, plasmid sequences, and processed data on lysate and purified  
726 enzyme activities are contained in the supplementary tables. Raw data on enzyme activities and  
727 Python code used for analysis are available from authors upon request.

### 728 **Funding**

729 This work was supported by a Washington Research Foundation Postdoctoral Fellowship to  
730 J.W. and funding from the University of Washington to M.E.L. Gene synthesis was provided by  
731 the Synthetic Biology program at the Joint Genome Institute of the Department of Energy.

### 732 **Conflicts of interest**

733 The authors declare no conflicts of interest.

## 734 References

- 735 1 Peralta-Yahya, P.P., Zhang, F., del Cardayre, S.B. and Keasling, J.D. (2012) Microbial  
736 Engineering for the Production of Advanced Biofuels. *Nature*, **488**, 320–328.
- 737 2 Yishai, O., Lindner, S.N., Gonzalez de la Cruz, J., Tenenboim, H. and Bar-Even, A. (2016)  
738 The Formate Bio-Economy. *Current Opinion in Chemical Biology*, Elsevier Ltd, **35**, 1–9.  
739 <https://doi.org/10.1016/j.cbpa.2016.07.005>.
- 740 3 Li, H., Oppenorth, P.H., Wernick, D.G., Rogers, S., Wu, T.-Y., Higashide, W., Malati, P.,  
741 Huo, Y.-X., Cho, K.M. and Liao, J.C. (2012) Integrated Electromicrobial Conversion of  
742 {CO<sub>2</sub>} to Higher Alcohols. *Science*, **335**, 1596.
- 743 4 Liu, C., Colón, B.C., Ziesack, M., Silver, P.A. and Nocera, D.G. (2016) Water Splitting–  
744 Biosynthetic System with CO<sub>2</sub> Reduction Efficiencies Exceeding Photosynthesis. *Science*,  
745 **352**, 1210–1213. <https://doi.org/10.1126/science.aaf5039>.
- 746 5 Jouny, M., Luc, W. and Jiao, F. (2018) General Techno-Economic Analysis of CO<sub>2</sub>  
747 Electrolysis Systems. *Industrial & Engineering Chemistry Research*, American Chemical  
748 Society, **57**, 2165–2177. <https://doi.org/10.1021/acs.iecr.7b03514>.
- 749 6 Bar-Even, A., Noor, E., Flamholz, A. and Milo, R. (2013) Design and Analysis of Metabolic  
750 Pathways Supporting Formatotrophic Growth for Electricity-Dependent Cultivation of  
751 Microbes. *Biochim. Biophys. Acta*, **1827**, 1039–1047.
- 752 7 Bar-Even, A. (2016) Formate Assimilation: The Metabolic Architecture of Natural and  
753 Synthetic Pathways. *Biochemistry*, **55**, 3851–3863.  
754 <https://doi.org/10.1021/acs.biochem.6b00495>.
- 755 8 Siegel, J.B., Smith, A.L., Poust, S., Wargacki, A.J., Bar-Even, A., Louw, C., Shen, B.W.,  
756 Eiben, C.B., Tran, H.M., Noor, E., Gallaher, J.L., Bale, J., Yoshikuni, Y., Gelb, M.H.,  
757 Keasling, J.D., Stoddard, B.L., Lidstrom, M.E. and Baker, D. (2015) Computational Protein  
758 Design Enables a Novel One-Carbon Assimilation Pathway. *Proc. Natl. Acad. Sci. U. S. A.*,  
759 **112**, 3704–3709.
- 760 9 Kim, S., Lindner, S.N., Aslan, S., Yishai, O., Wenk, S., Schann, K. and Bar-Even, A. (2020)  
761 Growth of *E. Coli* on Formate and Methanol via the Reductive Glycine Pathway. *Nature*  
762 *Chemical Biology*, Nature Publishing Group, **16**, 538–545. <https://doi.org/10.1038/s41589-020-0473-5>.
- 764 10 Bang, J., Hwang, C.H., Ahn, J.H., Lee, J.A. and Lee, S.Y. (2020) *Escherichia Coli* Is  
765 Engineered to Grow on CO<sub>2</sub> and Formic Acid. *Nature Microbiology*, Nature Publishing  
766 Group, 1–5. <https://doi.org/10.1038/s41564-020-00793-9>.
- 767 11 KATO, N., YURIMOTO, H. and THAUER, R.K. (2006) The Physiological Role of the  
768 Ribulose Monophosphate Pathway in Bacteria and Archaea. *Bioscience, Biotechnology,*  
769 *and Biochemistry*, **70**, 10–21. <https://doi.org/10.1271/bbb.70.10>.
- 770 12 He, H., Höper, R., Dodenhöft, M., Marlière, P. and Bar-Even, A. (2020) An Optimized  
771 Methanol Assimilation Pathway Relying on Promiscuous Formaldehyde-Condensing  
772 Aldolases in *E. Coli*. *Metabolic Engineering*, **60**, 1–13.  
773 <https://doi.org/10.1016/j.ymben.2020.03.002>.
- 774 13 Poust, S., Piety, J., Bar-Even, A., Louw, C., Baker, D., Keasling, J.D. and Siegel, J.B. (2015)  
775 Mechanistic Analysis of an Engineered Enzyme That Catalyzes the Formose Reaction.  
776 *ChemBioChem*, **16**, 1950–1954. <https://doi.org/10.1002/cbic.201500228>.
- 777 14 Lu, X., Liu, Y., Yang, Y., Wang, S., Wang, Q., Wang, X., Yan, Z., Cheng, J., Liu, C., Yang,  
778 X., Luo, H., Yang, S., Gou, J., Ye, L., Lu, L., Zhang, Z., Guo, Y., Nie, Y., Lin, J., Li, S., Tian,

- 779 C., Cai, T., Zhuo, B., Ma, H., Wang, W., Ma, Y., Liu, Y., Li, Y. and Jiang, H. (2019)  
780 Constructing a Synthetic Pathway for Acetyl-Coenzyme A from One-Carbon through  
781 Enzyme Design. *Nature Communications*, **10**. <https://doi.org/10.1038/s41467-019-09095-z>.
- 782 15 Chou, A., Clomburg, J.M., Qian, S. and Gonzalez, R. (2019) 2-Hydroxyacyl-CoA Lyase  
783 Catalyzes Acyloin Condensation for One-Carbon Bioconversion. *Nature Chemical Biology*,  
784 **15**, 900–906. <https://doi.org/10.1038/s41589-019-0328-0>.
- 785 16 Burgener, S., Cortina, N.S. and Erb, T.J. (2020) Oxalyl-CoA Decarboxylase Enables  
786 Nucleophilic One-Carbon Extension of Aldehydes to Chiral  $\alpha$ -Hydroxy Acids. *Angewandte*  
787 *Chemie International Edition*, **59**, 5526–5530. <https://doi.org/10.1002/anie.201915155>.
- 788 17 Goldenzweig, A., Goldsmith, M., Hill, S.E., Gertman, O., Laurino, P., Ashani, Y., Dym, O.,  
789 Unger, T., Albeck, S., Prilusky, J., Lieberman, R.L., Aharoni, A., Silman, I., Sussman, J.L.,  
790 Tawfik, D.S. and Fleishman, S.J. (2016) Automated Structure- and Sequence-Based Design  
791 of Proteins for High Bacterial Expression and Stability. *Molecular Cell*, **63**, 337–346.  
792 <https://doi.org/10.1016/j.molcel.2016.06.012>.
- 793 18 Bräsen, C., Urbanke, C. and Schönheit, P. (2005) A Novel Octameric AMP-Forming Acetyl-  
794 CoA Synthetase from the Hyperthermophilic Crenarchaeon *Pyrobaculum Aerophilum*. *FEBS*  
795 *Letters*, **579**, 477–482. <https://doi.org/10.1016/j.febslet.2004.12.016>.
- 796 19 Russ, L., Harhangi, H.R., Schellekens, J., Verdellen, B., Kartal, B., Op Den Camp, H.J.M.  
797 and Jetten, M.S.M. (2012) Genome Analysis and Heterologous Expression of Acetate-  
798 Activating Enzymes in the Anammox Bacterium *Kuenenia stuttgartiensis*. *Archives of*  
799 *Microbiology*, **194**, 943–948. <https://doi.org/10.1007/s00203-012-0829-7>.
- 800 20 Trudeau, D.L., Edlich-Muth, C., Zarzycki, J., Scheffen, M., Goldsmith, M., Khersonsky, O.,  
801 Avizemer, Z., Fleishman, S.J., Cotton, C.A.R., Erb, T.J., Tawfik, D.S. and Bar-Even, A.  
802 (2018) Design and in Vitro Realization of Carbon-Conserving Photorespiration. *Proceedings*  
803 *of the National Academy of Sciences*, 201812605.  
804 <https://doi.org/10.1073/pnas.1812605115>.
- 805 21 Copeland, A., Gu, W., Yasawong, M., Lapidus, A., Lucas, S., Deshpande, S., Pagani, I.,  
806 Tapia, R., Cheng, J.-F., Goodwin, L.A., Pitluck, S., Liolios, K., Ivanova, N., Mavromatis, K.,  
807 Mikhailova, N., Pati, A., Chen, A., Palaniappan, K., Land, M., Pan, C., Brambilla, E.-M.,  
808 Rohde, M., Tindall, B.J., Sikorski, J., Göker, M., Detter, J.C., Bristow, J., Eisen, J.A.,  
809 Markowitz, V., Hugenholtz, P., Kyrpides, N.C., Klenk, H.-P. and Woyke, T. (2012) Complete  
810 Genome Sequence of the Aerobic, Heterotroph *Marinithermus Hydrothermalis* Type Strain  
811 (T1T) from a Deep-Sea Hydrothermal Vent Chimney. *Standards in Genomic Sciences*, **6**,  
812 21–30. <https://doi.org/10.4056/sigs.2435521>.
- 813 22 Ingram-Smith, C., Woods, B.I. and Smith, K.S. (2006) Characterization of the Acyl Substrate  
814 Binding Pocket of Acetyl-CoA Synthetase. *Biochemistry*, **45**, 11482–11490.  
815 <https://doi.org/10.1021/bi061023e>.
- 816 23 Reger, A.S., Carney, J.M. and Gulick, A.M. (2007) Biochemical and Crystallographic  
817 Analysis of Substrate Binding and Conformational Changes in Acetyl-CoA Synthetase.  
818 *Biochemistry*, **46**, 6536–6546. <https://doi.org/10.1021/bi6026506>.
- 819 24 Fischer, B., Boutserin, S., Mazon, H., Collin, S., Branlant, G., Gruez, A. and Talfournier, F.  
820 (2013) Catalytic Properties of a Bacterial Acylating Acetaldehyde Dehydrogenase: Evidence  
821 for Several Active Oligomeric States and Coenzyme A Activation upon Binding. *Chemico-*  
822 *Biological Interactions*, **202**, 70–77. <https://doi.org/10.1016/j.cbi.2012.11.006>.
- 823 25 Zhu, H., Gonzalez, R. and Bobik, T.A. (2011) Coproduction of Acetaldehyde and Hydrogen  
824 during Glucose Fermentation by *Escherichia Coli*. *Applied and Environmental Microbiology*,  
825 **77**, 6441–6450. <https://doi.org/10.1128/AEM.05358-11>.

- 826 26 Chistoserdova, L., Lapidus, A., Han, C., Goodwin, L., Saunders, L., Brettin, T., Tapia, R.,  
827 Gilna, P., Lucas, S., Richardson, P.M. and Lidstrom, M.E. (2007) Genome of  
828 *Methylobacillus Flagellatus*, Molecular Basis for Obligate Methylo-trophy, and Polyphyletic  
829 Origin of Methylo-trophy. *Journal of Bacteriology*, **189**, 4020–4027.  
830 <https://doi.org/10.1128/JB.00045-07>.
- 831 27 Puri, A.W., Owen, S., Chu, F., Chavkin, T., Beck, D.A.C., Kalyuzhnaya, M.G. and Lidstrom,  
832 M.E. (2015) Genetic Tools for the Industrially Promising Methanotroph *Methylomicrobium*  
833 *Buryatense*. *Appl. Environ. Microbiol.*, **81**, 1775–1781. <https://doi.org/10.1128/AEM.03795-834>.
- 835 28 Kleeberg, U. and Klinger, W. (1982) Sensitive Formaldehyde Determination with NASH's  
836 Reagent and a 'Tryptophan Reaction.' *Journal of Pharmacological Methods*, **8**, 19–31.  
837 [https://doi.org/10.1016/0160-5402\(82\)90004-3](https://doi.org/10.1016/0160-5402(82)90004-3).
- 838 29 He, L., Fu, Y. and Lidstrom, M.E. (2019) Quantifying Methane and Methanol Metabolism of "  
839 *Methylotuvimicrobium Buryatense*" 5GB1C under Substrate Limitation. Mackelprang, R.,  
840 Ed., *mSystems*, **4**, e00748-19, /msystems/4/6/msys.00748-19.atom.  
841 <https://doi.org/10.1128/mSystems.00748-19>.
- 842 30 Fu, Y., He, L., Reeve, J., Beck, D.A.C. and Lidstrom, M.E. (2019) Core Metabolism Shifts  
843 during Growth on Methanol versus Methane in the Methanotroph *Methylomicrobium*  
844 *Buryatense* 5GB1. *mBio*, American Society for Microbiology, **10**.  
845 <https://doi.org/10.1128/mBio.00406-19>.
- 846 31 Davidi, D., Shamshoum, M., Guo, Z., Bar-On, Y.M., Prywes, N., Oz, A., Jablonska, J.,  
847 Flamholz, A., Wernick, D.G., Antonovsky, N., de Pins, B., Shachar, L., Hochhauser, D.,  
848 Peleg, Y., Albeck, S., Sharon, I., Mueller-Cajar, O. and Milo, R. (2020) Highly Active  
849 Rubiscos Discovered by Systematic Interrogation of Natural Sequence Diversity. *The EMBO*  
850 *Journal*, John Wiley & Sons, Ltd, **n/a**, e104081. <https://doi.org/10.15252/embj.2019104081>.
- 851 32 Mak, W.S., Tran, S., Marcheschi, R., Bertolani, S., Thompson, J., Baker, D., Liao, J.C. and  
852 Siegel, J.B. (2015) Integrative Genomic Mining for Enzyme Function to Enable Engineering  
853 of a Non-Natural Biosynthetic Pathway. *Nat. Commun.*, **6**, 10005.
- 854 33 Tokuriki, N., Stricher, F., Serrano, L. and Tawfik, D.S. (2008) How Protein Stability and New  
855 Functions Trade Off. *PLoS Computational Biology*, **4**, 35–37.  
856 <https://doi.org/10.1371/journal.pcbi.1000002>.
- 857 34 Chan, C.H., Garrity, J., Crosby, H.A. and Escalante-Semerena, J.C. (2011) In *Salmonella*  
858 *Enterica*, the Sirtuin-Dependent Protein Acylation/Deacylation System (SDPADS) Maintains  
859 Energy Homeostasis during Growth on Low Concentrations of Acetate. *Molecular*  
860 *Microbiology*, **80**, 168–183. <https://doi.org/10.1111/j.1365-2958.2011.07566.x>.
- 861 35 Bar-even, A., Noor, E., Savir, Y., Liebermeister, W., Davidi, D., Taw, D.S. and Milo, R.  
862 (2011) The Moderately Efficient Enzyme : Evolutionary and Physicochemical Trends  
863 Shaping Enzyme Parameters. *Biochemistry*, 4402–4410.
- 864 36 Marx, C.J., Laukel, M., Vorholt, J.A. and Lidstrom, M.E. (2003) Purification of the Formate-  
865 Tetrahydrofolate Ligase from *Methylobacterium Exorquens* AM1 and Demonstration of Its  
866 Requirement for Methylo-trophic Growth. *Journal of Bacteriology*, **185**, 7169–7175.  
867 <https://doi.org/10.1128/JB.185.24.7169-7175.2003>.
- 868 37 I. Lan, E., Y. Ro, S. and C. Liao, J. (2013) Oxygen-Tolerant Coenzyme A-Acylating  
869 Aldehyde Dehydrogenase Facilitates Efficient Photosynthetic n -Butanol Biosynthesis in  
870 Cyanobacteria. *Energy & Environmental Science*, Royal Society of Chemistry, **6**, 2672–  
871 2681. <https://doi.org/10.1039/C3EE41405A>.



- 872 38 Zhao, Y., Lei, M., Wu, Y., Wang, C., Zhang, Z., Deng, F. and Wang, H. (2009) Molecular  
873 Cloning and Expression of the Complete DNA Sequence Encoding NAD<sup>+</sup>-Dependent  
874 Acetaldehyde Dehydrogenase from *Acinetobacter* Sp. Strain HBS-2. *Annals of*  
875 *Microbiology*, **59**, 97–104. <https://doi.org/10.1007/BF03175605>.
- 876 39 Chen, F.Y.-H., Jung, H.-W., Tsuei, C.-Y. and Liao, J.C. (2020) Converting *Escherichia Coli*  
877 to a Synthetic Methylophilic Growing Solely on Methanol. *Cell*, Elsevier, **182**, 933-946.e14.  
878 <https://doi.org/10.1016/j.cell.2020.07.010>.
- 879 40 He, H., Muth, C.E., Lindner, S.N. and Bar-even, A. (2018) Ribulose Monophosphate Shunt  
880 Provides Nearly All Biomass and Energy Required for Growth of *E. Coli* for Growth of *E.*  
881 *Coli*. <https://doi.org/10.1021/acssynbio.8b00093>.
- 882 41 Price, M.N., Dehal, P.S. and Arkin, A.P. (2010) FastTree 2 – Approximately Maximum-  
883 Likelihood Trees for Large Alignments. *PLOS ONE*, Public Library of Science, **5**, e9490.  
884 <https://doi.org/10.1371/journal.pone.0009490>.
- 885 42 Letunic, I. and Bork, P. (2019) Interactive Tree Of Life (ITOL) v4: Recent Updates and New  
886 Developments. *Nucleic Acids Research*, Oxford Academic, **47**, W256–W259.  
887 <https://doi.org/10.1093/nar/gkz239>.
- 888 43 Mitchell, A.L., Attwood, T.K., Babbitt, P.C., Blum, M., Bork, P., Bridge, A., Brown, S.D.,  
889 Chang, H.-Y., El-Gebali, S., Fraser, M.I., Gough, J., Haft, D.R., Huang, H., Letunic, I.,  
890 Lopez, R., Luciani, A., Madeira, F., Marchler-Bauer, A., Mi, H., Natale, D.A., Necci, M.,  
891 Nuka, G., Orengo, C., Pandurangan, A.P., Paysan-Lafosse, T., Pesseat, S., Potter, S.C.,  
892 Qureshi, M.A., Rawlings, N.D., Redaschi, N., Richardson, L.J., Rivoire, C., Salazar, G.A.,  
893 Sangrador-Vegas, A., Sigrist, C.J.A., Sillitoe, I., Sutton, G.G., Thanki, N., Thomas, P.D.,  
894 Tosatto, S.C.E., Yong, S.-Y. and Finn, R.D. (2019) InterPro in 2019: Improving Coverage,  
895 Classification and Access to Protein Sequence Annotations. *Nucleic Acids Research*,  
896 Oxford Academic, **47**, D351–D360. <https://doi.org/10.1093/nar/gky1100>.
- 897 44 Li, W. and Godzik, A. (2006) Cd-Hit: A Fast Program for Clustering and Comparing Large  
898 Sets of Protein or Nucleotide Sequences. *Bioinformatics*, Oxford Academic, **22**, 1658–1659.  
899 <https://doi.org/10.1093/bioinformatics/btl158>.
- 900 45 Finn, R.D., Clements, J. and Eddy, S.R. (2011) HMMER Web Server: Interactive Sequence  
901 Similarity Searching. *Nucleic Acids Research*, Oxford Academic, **39**, W29–W37.  
902 <https://doi.org/10.1093/nar/gkr367>.
- 903 46 Jeske, L., Placzek, S., Schomburg, I., Chang, A. and Schomburg, D. (2019) BRENDA in  
904 2019: A European ELIXIR Core Data Resource. *Nucleic Acids Research*, Oxford Academic,  
905 **47**, D542–D549. <https://doi.org/10.1093/nar/gky1048>.
- 906 47 Sievers, F., Wilm, A., Dineen, D., Gibson, T.J., Karplus, K., Li, W., Lopez, R., McWilliam, H.,  
907 Remmert, M., Söding, J., Thompson, J.D. and Higgins, D.G. (2011) Fast, Scalable  
908 Generation of High-Quality Protein Multiple Sequence Alignments Using Clustal Omega.  
909 *Molecular Systems Biology*, John Wiley & Sons, Ltd, **7**, 539.  
910 <https://doi.org/10.1038/msb.2011.75>.
- 911 48 Starai, V.J., Gardner, J.G. and Escalante-Semerena, J.C. (2005) Residue Leu-641 of  
912 Acetyl-CoA Synthetase Is Critical for the Acetylation of Residue Lys-609 by the Protein  
913 Acetyltransferase Enzyme of *Salmonella Enterica*. *Journal of Biological Chemistry*, **280**,  
914 26200–26205. <https://doi.org/10.1074/jbc.M504863200>.
- 915 49 Datsenko, K.A. and Wanner, B.L. (2000) One-Step Inactivation of Chromosomal Genes in  
916 *Escherichia Coli* K-12 Using PCR Products. *Proceedings of the National Academy of*  
917 *Sciences of the United States of America*, **97**, 6640–5.  
918 <https://doi.org/10.1073/pnas.120163297>.

- 919 50 Studier, F.W. (2005) Protein Production by Auto-Induction in High-Density Shaking Cultures.  
920 *Protein Expression and Purification*, **41**, 207–234. <https://doi.org/10.1016/j.pep.2005.01.016>.
- 921 51 Khersonsky, O., Lipsh, R., Avizemer, Z., Ashani, Y., Goldsmith, M., Leader, H., Dym, O.,  
922 Rogotner, S., Trudeau, D.L., Prilusky, J., Amengual-Rigo, P., Guallar, V., Tawfik, D.S. and  
923 Fleishman, S.J. (2018) Automated Design of Efficient and Functionally Diverse Enzyme  
924 Repertoires. *Molecular Cell*. <https://doi.org/10.1016/j.molcel.2018.08.033>.
- 925 52 Kille, S., Acevedo-Rocha, C.G., Parra, L.P., Zhang, Z.-G., Opperman, D.J., Reetz, M.T. and  
926 Acevedo, J.P. (2013) Reducing Codon Redundancy and Screening Effort of Combinatorial  
927 Protein Libraries Created by Saturation Mutagenesis. *ACS Synthetic Biology*, **2**, 83–92.  
928 <https://doi.org/10.1021/sb300037w>.
- 929 53 Zarzycki, J., Sutter, M., Cortina, N.S., Erb, T.J. and Kerfeld, C.A. (2017) In Vitro  
930 Characterization and Concerted Function of Three Core Enzymes of a Glycyl Radical  
931 Enzyme - Associated Bacterial Microcompartment. *Scientific Reports*, Nature Publishing  
932 Group, **7**, 1–12. <https://doi.org/10.1038/srep42757>.
- 933 54 Marx, C.J. and Lidstrom, M.E. (2001) Development of Improved Versatile Broad-Host-  
934 Range Vectors for Use in Methyloprophs and Other Gram-Negative Bacteria. *Microbiology*,  
935 **147**, 2065–2075.
- 936 55 Vishniac, W. and Santer, M. (1957) THE THIOBACILLI, 12. *Bacteriological Reviews*, **21**,  
937 195–213.
- 938 56 Yishai, O., Goldbach, L., Tenenboim, H., Lindner, S.N. and Bar-Even, A. (2017) Engineered  
939 Assimilation of Exogenous and Endogenous Formate in Escherichia Coli. *ACS Synthetic*  
940 *Biology*, [acssynbio.7b00086](https://doi.org/10.1021/acssynbio.7b00086). <https://doi.org/10.1021/acssynbio.7b00086>.
- 941 57 Fu, Y., Li, Y. and Lidstrom, M. (2017) The Oxidative TCA Cycle Operates during  
942 Methanotrophic Growth of the Type I Methanotroph Methylomicrobium Buryatense 5GB1.  
943 *Metabolic Engineering*, **42**, 43–51. <https://doi.org/10.1016/j.ymben.2017.05.003>.  
944
